# Supplementary material for: Chlorosome-inspired controlled assembly of 2D porphyrin heterostructures toward directed energy transfer and charge separation
Source: Research Square preprint supplement (doi:10.21203/rs.3.rs-8448665/v1), 2025-12-30
Supplement: Supplementary file 1 [file 7b129ea2848feee7b002ecd8.docx]

Supplementary Information

**Chlorosome-inspired controlled assembly of 2D porphyrin heterostructures toward directed energy transfer and charge separation**

Yifei Lei1,2, Jiangshan Zhang1,2, Yifei Han2, Shixing Lei2, Song-Hai Xie1, Shu Wang3, Zhiyuan Huang3,*, Dan-Wei Zhang1,*, Zhan-Ting Li2,*, Li-Zhu Wu3,*, Chen-Ho Tung3, and Jia Tian2,*

1Department of Chemistry, Fudan University, 2205 Songhu Road, Shanghai 200438, China.

2State Key Laboratory of Organometallic Chemistry and Shanghai Hongkong Joint Laboratory in Chemical Synthesis, Shanghai Institute of Organic Chemistry, University of Chinese Academy of Sciences, Chinese Academy of Sciences, Shanghai 200032, China.

3Key Laboratory of Photochemical Conversion and Optoelectronic Materials, Technical Institute of Physics and Chemistry, The Chinese Academy of Sciences, Beijing 100190, China.

E-mail: huangzhiyuan@mail.ipc.ac.cn; zhangdw@fudan.edu.cn; ztli@mail.sioc.ac.cn; lzwu@mail.ipc.ac.cn; tianjia@sioc.ac.cn

**Table of Contents**

[**I. General Remarks** S3](#_Toc216906278)

[**II. Synthetic procedures** S7](#_Toc216906279)

[**III. Graphs and Microscopies** S14](#_Toc216906280)

[**IV.** **Tables** S44](#_Toc216906281)

[**V. 1H and 13C NMR Spectra** S46](#_Toc216906282)

[**References** S64](#_Toc216906283)

**I. General Remarks**

**Reagents and Solvents** were purchased as reagent grade and used as received. MeOH and deionized water used in self-assembly are of HPLC grade. **1H NMR and 13C NMR** were recorded with a Bruker AVANCE Ⅲ HD 400MHz spectrometer. The residual deuterated solvent was used as the internal reference for 1H NMR (CDCl3: δH = 7.26 ppm, CD3OD: δH = 3.31 ppm, DMSO-d6 δH = 2.50 ppm). **High-resolution mass spectrometry (HR-MS)** for the characterization of new compounds was performed on a Waters G2-XS TOF.

**Target molecules** can be dissolved in MeOH, dimethyl sulfoxide (DMSO), and N, N-dimethylformamide (DMF). Except for **SPPZn**, all of them exhibit poor water solubility (<10 μM). After metal coordination, the centered N-H signal of free-base porphyrins at -3 in 1H NMR disappeared. The Q-band of Ultraviolet-Visible (UV-vis) absorption spectroscopy changed from four peaks to two (Supplementary Fig. 1). Changes in shape and relative intensity of fluorescence emission spectra for different porphyrins gave further **evidence** for the successful **synthesis** of different metal-centered porphyrins (Supplementary Fig. 1).

**Ultraviolet–visible spectroscopy (UV-vis)** was performed in 1 cm path length quartz cells using an Agilent Cary 100 UV-vis spectrophotometer with a Greatwall HX Series circulating pump for temperature control. Temperature-dependent UV-vis experiments were carried out under the circulating water of two sealed cells. The following equation calculates the degree of aggregation (αagg):

(**Eq 1**)

*A*, *A*mono, and *A*agg are the absorption of current temperature, the absorption of monomers (at high temperature), and the absorption of aggregations (at the lowest temperature), respectively. In the Meijer-Schenning-van der Schoot model,1 supramolecular polymerization comprises two periods: nucleation and elongation. A non-sigmoidal cooling curve can be fitted in this model from the following equation:

(**Eq 2**)

αSAT, *h*e, *T*e, *T*, *R* stand for the constant term introduced during the fitting process, the enthalpy release during elongation, the critical elongation temperature, the current temperature, and the molar gas constant, respectively.

**Fluorescence spectroscopy** was performed with a SHIMADZU RF-6000 spectrofluorometer in a 1 cm path length quartz cell. All target porphyrins were excited at 430 nm. The scanning rate, excitation bandwidth, and emission bandwidth were 2000 nm/min, 10 nm, and 10 nm, respectively. Fluorescence quenching experiments were carried out by adding different amounts of acceptor solution (0.5 mM **TPPCo** in MeOH containing 5 μM **TPPZn**) to donor solution (5 μM porphyrins in MeOH/H2O, v/v = 1/1) to give an acceptor-to-donor molar ratio of 2% to 400%.MeOH

**Self-assembly** was conducted in 4 mL or 20 mL vials in heating modules. The detailed **seeded growth** method was as follows: **TPPZn** solid was dissolved in MeOH to give a 1 mM solution; a portion of this was diluted with MeOH and H2O to yield a 0.1 mM MeOH/H2O (v/v = 1/1) solution. The solution was heated in a 60 °C heating module for 30 min, slowly cooled to room temperature (20 °C), and placed at r.t. for more than one day (called annealing). The freshly prepared **2DZn** platelets (self-seeding samples, called **SN**) were then sonicated using a FS-150NS sonication rod (Baihang, Jiangsu, φ = 3 mm, 120 W) under an ice-water bath at 0 °C for 15 min and reannealed at 40 °C for 10 min to obtain seeds. The 1 mM **TPPZn** solution mentioned above was then used to prepare a monomer solution containing 0.5 mM **TPPZn** and 2% (v/v) 2,2,2-trifluoroethanol (TFE) in MeOH. Seeds were quartered, diluted in 10 μM in MeOH/H2O (v/v = 1/1), and placed in 40 °C heating module together with the monomer solution. About 10 min later, various volumes of monomer solution were added to the seeds using a pipette. Samples of molar ratio of monomer to seed (nm/ns) = 2, 4, 6, 8 were then vortexed for 4 s and slowly cooled to 20 °C. For heteroepitaxial growth, monomer solution with [**TPPCo**] = 0.5 mM in MeOH was added to **GZn** (30 μM in MeOH/H2O (v/v = 1/1)) at molar ratios of monomer to seed (Co/Zn) ranging from 0.1 to 2 at 40 °C and cooled periodically to r.t.

**Transmission electron microscopy (TEM)** images were obtained on a Tecnai G2 F20 S-Twin or a JEOL JEM-2100, with acceleration voltages of 80 kV or 200 kV, respectively. A sample solution (5 μL) was dropped onto a 300-mesh Copper grid with a 6-nm-thick carbon layer, wicked with filter paper, and dried in a desiccator overnight. **Cryogenic TEM** was performed using a JEOL CryoARM at 300kV with a Gatan K3 CCD camera.

**Atom force** **microscopy** **(AFM)** images were captured on a Bruker JPK Nano Wizard Sense system AFM. The microscope was equipped with the DirectOverlay 2 software module and a Tap150AI-G probe (tip radius of 10 nm). A sample solution (10-20 μL) was deposited on a clean, flat silicon surface for 5 min, then removed by a dry N2 flow. More than 20 nanosheets were measured, with an average height of 6.8 nm.

**Ultrafiltration** was performed using 15 mL Millipore ultrafiltration spin columns (4 mL sample pool, 30 kD pore size) in a XiangYi H1850 centrifuge at 6000 rpm for 30 minutes. Samples for solution-phase Small Angle X-ray Scattering (SAXS) and Wide Angle X-ray Scattering (WAXS) were prepared by ultrafiltration of 3.0 mL of 0.1 mM TPPM assemblies into 0.1 mL. 10 μL of the liquid above was transferred into 1-mm-diameter quartz tubes. SAXS and WAXS experiments were performed at Beamline BL16B1, Shanghai Synchrotron Radiation Facility (SSRF). The flux of the incident X-ray beam was about 2 × 1011 photons s-1. The signal was collected with a Rayonix SX-165 CCD (Rayonix, Evanston, IL, USA) area detector with 2048 × 2048 pixels and a pixel size of 80 × 80 µm2. Samples were exposed for 30-300 s on the X-ray, and the two-dimensional (2D) scattering patterns were then azimuthally integrated to generate scattering vector magnitude *q* vs. intensity plots, where *q* is defined as

(**Eq 3**)

where θ denotes half of the total scattering angle, and λ is the X-ray wavelength, 1.24 Å.

For statistical size analysis of 2D assemblies, more than 80 nanosheets in TEM images were traced by hand in ImageJ to determine their length (L) and width (W, the distance between the two long sides). Values of number average length (*Ln*), number average area (An), weight average area (Aw), polymer dispersity index (PDI), the aspect ratio, and the standard error (SE) of each sample were calculated as shown below:

(**Eq 4**) (**Eq 5**) (**Eq 6**)

(**Eq 7**) (**Eq 8**) (**Eq 9**)

n and Ni are the total number and the number of items, respectively. *S* denotes sample variance.

High-resolution **confocal laser scanning microscope** **(CLSM)** was performed on a Leica STELLARIS 5 using 100× oil immersion objective in lightning mode. **Fluorescence lifetime imaging microscopy (FLIM)** was performed on a PicoQuant MicroTime 200 using a 100× oil-immersion objective. The detector was a Single-Photon Avalanche Diode (SPAD). The dwell time was 5 μs. SymPhoTime 64 was used to fit the lifetime using a 3rd-order decay curve. A sample solution (4 μL) was sealed between two cover slides. Samples are imaged using the 405 nm excitation laser and 561-690 nm dark field detector. Under intense laser excitation, the samples photobleached during imaging. Triethylenediamine (DABCO) was added to the sample solution (2% w/v) when Co/Zn was 0.2 or 0.5 to suppress fluorescence quenching.

Calculation for **energy transfer efficiency** (ΦET) and **Stern-Volmer Plot** by fluorescence quenching on acceptor (A) to donor (D) was carried out by the following method:

(**Eq 10**)

*I* and *I*0 are the fluorescence intensity of one particular amount of A added to the D solution and the fluorescence intensity of the D solution only. **TPPZn**/**Co** fluorescence quenching system can be fitted using the Stern-Volmer function:2,3

(**Eq 11**)

*K*SV is the Stern-Volmer quenching constant, and [A] is the concentration of acceptor. In the assembly system, *K*SV describes the radiative transition property of donors.

**Femtosecond** (0 to 5500 ps) **pump-probe transient absorption spectra (fs-TAS)** measurements were performed using HELIOS FIRE, Ultrafast Systems. The pump pulses at 400-750 nm were generated with an optical parametric amplifier (Apollo-T, Ultrafast Systems). The femtosecond white light probe pulses were generated by focusing the 1 kHz Ti: Sapphire amplifier (SPFIRE ACE, 800 nm fundamental, 100 fs pulse width) output onto sapphire (fs-TA, VIS: 420-800 nm). The spot diameters of the pump and probe beams focused on the sample were approximately 100 μm. The samples ([**TPPZn**] = 30 μM in MeOH/H2O (v/v = 1/1)) were placed in 2 mm quartz cuvettes, nitrogen was bubbled through the solutions, and the solutions were vigorously stirred during all measurements. In this work, the sample solutions were excited by a 400 nm pump beam and detected at 430-750 nm.

**II. Synthetic procedures**

**Scheme S1** Synthesis of target Zn-porphyrins.

**General procedure 1: synthesis of** **methyl multi-alkoxybenzoate**5-7

Methyl multi-hydroxybenzoate, 1-Bromohexadecane, K2CO3, and tetrabutylammonium bromide (TBAB) were added in acetone and heated to reflux under N2 for 2-4 days. After cooling to room temperature, the solvent was removed under reduced pressure. Dichloromethane (DCM) and distilled water were added to the reaction mixture, and the organic phase was dispensed and washed with distilled water and saturated NaCl solution. After drying over Na2SO4, the crude product was further purified by elution on a silica gel column with hexane/ethyl acetate (EA) (20/1, v/v) to yield methyl multi-alkoxybenzoates.

**General procedure 2: synthesis of alkoxybenzonic acid**5-7

Methyl alkoxybenzoate and KOH were dissolved in a tetrahydrofuran(THF)/EtOH/H2O mixture and heated to reflux for 2 h. After the mixture was cooled to room temperature, 1 M HCl aq. was added dropwise to the solution until pH = 3. The resulting precipitate was filtered, washed with distilled water three times, and dried under vacuum to give alkoxybenzonic acid.

**General procedure 3: synthesis of target metal-porphyrins**8

**B2**, alkoxybenzonic acid, n-(3-dimethylaminopropyl)-n'-ethylcarbodiimide hydrochloride (EDCI), and 4-dimethylaminopyridine (DMAP) were dissolved in chloroform. Under N2 in dark conditions, the mixture was stirred at room temperature for 24 h. Then the mixture was washed with saturated NaHCO3 solution (20 mL), distilled water (20 mL), and saturated NaCl solution (20 mL). After drying over Na2SO4 and concentrating by rotary evaporation, the crude product was further purified by elution on a silica gel column with DCM/MeOH (v/v = 50/1) to yield electrically neutral porphyrin precursors.

Then, these precursors, together with chloroform and N,N-dimethylformamide (DMF) (v/v = 1/1), were added to a Schlenk tube. CH3I was added before the mixture was stirred and heated to 40 °C in the dark for 24 h. After cooling to room temperature and evaporating overnight in a fume hood, the solvent was removed under reduced pressure, leaving a black solid. The solid was dissolved in 20 mL of anhydrous DMF for metal coordination.

Zn(OAc)2 or Co(OAc)2 was added to the solution above, which was then stirred in the dark under r.t. or 45 °C for 24 h. After the solution turned dark green or purplish-red, an overdose of NH4PF6 and H2O was added. The resulting precipitate was filtered, washed three times with distilled water, and dried to give the hexafluorophosphate. The hexafluorophosphate solid was then dissolved in acetonitrile (MeCN) and mixed with tetrabutyl ammonium chloride monohydrate (TBACl·H2O) solution (saturated in MeCN). The resulting precipitate was filtered, washed twice with MeCN, and dried under vacuum to give the target products.

**T-COOMe** was prepared in a 36% yield as a white solid (0.62 g) using **general procedure 1**. Methyl gallate (0.37 g, 2.0 mmol), 1-Bromohexadecane (1.95 g, 6.4 mmol), K2CO3 (1.38 g, 10.0 mmol), and TBAB (3.2 mg, 0.050 mmol) were added in acetone (50 mL). 1H NMR (400 MHz, CDCl3) δ 7.25 (s, 2H), 4.00 (t, *J* = 4.6 Hz, 6H), 3.89 (s, 3H), 1.77 (dt, *J* = 28.2, 7.4 Hz, 6H), 1.46 (q, *J* = 7.4 Hz, 6H), 1.26 (s, 72H), 0.88 (t, *J* = 6.8 Hz, 9H).

**T-COOH** was prepared in a 93% yield as a white solid using **general procedure 2**. 1H NMR (400 MHz, CDCl3) δ 7.31 (s, 2H), 4.03 (q, *J* = 7.0 Hz, 6H), 1.78 (dq, *J* = 21.8, 7.4 Hz, 6H), 1.47 (q, *J* = 7.0 Hz, 6H), 1.26 (s, 72H), 0.88 (t, *J* = 6.8 Hz, 9H).

**m-D-COOMe** was prepared in a 42% yield as a white solid (0.53 g) using **general procedure 1**. Methyl 3,5-dihydroxybenzoate (0.34 g, 2.0 mmol), 1-Bromohexadecane (1.5 g, 5.0 mmol), K2CO3 (0.70 g, 5.0 mmol), and TBAB (36 mg, 0.10 mmol) were added in acetone (45 mL). 1H NMR (400 MHz, CDCl3) δ 7.16 (s, 2H), 6.64 (s, 1H), 3.97 (t, *J* = 6.6 Hz, 4H), 3.90 (s, 3H), 1.78 (m, 4H), 1.45 (m, 4H), 1.27 (s, 48H), 0.88 (t, *J* = 6.6 Hz, 6H).

**m-D-COOH** was prepared in a 92% yield as a white solid using **general procedure 2**. 1H NMR (400 MHz, CDCl3) δ 7.21 (d, *J* = 2.4 Hz, 2H), 6.68 (s, 1H), 3.98 (t, *J* = 6.4 Hz, 4H), 1.78 (m, 4H), 1.26 (m, 52H), 0.88 (t, *J* = 6.8 Hz, 6H).

**o-D-COOMe** was prepared in a 56% yield as a white solid (0.70 g) using **general procedure 1**. Methyl 3,4-dihydroxybenzoate (0.34 g, 2.0 mmol), 1-Bromohexadecane (1.8 g, 6.0 mmol), and K2CO3 (0.83 g, 6.0 mmol) were added in acetone (70 mL). 1H NMR (400 MHz, CDCl3) δ 7.63 (dd, *J* = 8.4, 2.0 Hz, 1H), 7.53 (d, *J* = 2.0 Hz, 1H), 6.86 (d, *J* = 8.4 Hz, 1H), 4.04 (td, *J* = 6.8, 3.6 Hz, 4H), 3.88 (s, 3H), 1.83 (dq, *J* = 10.8, 6.6 Hz, 4H), 1.47 (t, *J* = 7.6 Hz, 4H), 1.26 (s, 48H), 0.88 (t, *J* = 6.8 Hz, 6H).

**o-D-COOH** was prepared in a 71% yield as a white solid using **general procedure 2**. 1H NMR (400 MHz, CDCl3) δ 7.71 (dd, *J* = 8.4, 2.0 Hz, 1H), 7.58 (d, *J* = 2.0 Hz, 1H), 6.89 (d, *J* = 8.4 Hz, 1H), 4.06 (q, *J* = 6.8 Hz, 4H), 1.84 (q, *J* = 6.8 Hz, 4H), 1.47 (d, *J* = 7.6 Hz, 4H), 1.26 (s, 48H), 0.88 (t, *J* = 6.8 Hz, 6H).

**S-COOMe** was synthesized by the following method. Methylparaben (1.5 g, 10 mmol), 1-Bromo-hexadecane (3.1 g, 10 mmol), and K2CO3 (2.1 g, 15 mmol) were added in MeCN (80 mL) and heated to 70 °C under N2 for 24 hours. After cooling to room temperature, deionized water (70 mL) was added. The precipitate was filtered, washed with distilled water three times, and dried to give the white crystal **S-COOMe** (3.8 g, 99%). 1H NMR (400 MHz, CDCl3) δ 8.00-7.95 (m, 2H), 6.92-6.87 (m, 2H), 4.00 (t, *J* = 6.8 Hz, 2H), 3.88 (s, 3H), 1.84-1.75 (m, 2H), 1.45 (m, 2H), 1.26 (s, 24H), 0.88 (t, *J* = 7.2 Hz, 3H).

**S-COOH** was prepared in an 87% yield as a white solid using **general procedure 2**. 1H NMR (400 MHz, CDCl3) δ 8.04 (d, *J* = 8.8 Hz, 2H), 6.93 (d, *J* = 8.8 Hz, 2H), 4.02 (t, *J* = 6.8 Hz, 2H), 1.81 (p, *J* = 6.8 Hz, 2H), 1.46 (m, 2H), 1.26 (s, 24H), 0.88 (t, *J* = 7.2 Hz, 3H).

**B1** was synthesized by the following method.[5] 4-Pyridinecarboxaldehyde (6.4 g, 60 mmol) and 4-acetamidobenzaldehyde (3.5 g, 22 mmol) were dissolved in propionic acid (320 mL) and were stirred at 80 °C for 30 min. Pyrrole (5.4 g, 80 mmol) was then added to the reaction mixture, which was heated to reflux for 5 h. After the mixture was cooled, propionic acid was removed under reduced pressure. 4 M KOH aqueous (120 mL) was slowly added to the mixture until the pH reached 8-9; a black solid was obtained. The mixture was sonicated and filtered, then washed with distilled water (100 mL ×3) and dried to give the crude product. The black solid was dissolved in DCM and MeOH and purified by column chromatography twice, using DCM/MeOH (v/v = 60/1 to 30/1), yielding a purple solid **B1** 0.60 g (5%). 1H NMR (400 MHz, DMSO-*d*6) δ 10.40 (s, 1H), 9.05 (d, *J* = 4.4 Hz, 6H), 8.98-8.79 (m, 8H), 8.27 (d, *J* = 4.4 Hz, 6H), 8.15 (d, *J* = 8.0 Hz, 2H), 8.06 (d, *J* = 8.0 Hz, 2H), 2.23 (s, 3H), -3.00 (s, 2H).

**B2** was synthesized by the following method. **B1** (0.17 mg, 0.25 mmol) was dissolved in trifluoroacetic acid (TFA, 12 mL) and distilled water (12 mL), and heated to 85 °C under N2 for 6 h. After the mixture cooled, TFA was removed under reduced pressure. 1 M Na2CO3 aq. was slowly added to the mixture until the pH reached 8-9, precipitating a purple solid. DCM (120 mL) was added to the mixture, and the organic phase was then washed with distilled water (100 mL) and saturated NaCl solution (100 mL). After drying over Na2SO4, DCM was removed under reduced pressure to yield a purple solid **B2** (0.15 g, yield 92%). 1H NMR (400 MHz, DMSO-*d*6) δ 9.05 (d, *J* = 5.2 Hz, 8H), 8.87 (s, 6H), 8.27 (d, *J* = 4.8 Hz, 6H), 7.87 (d, *J* = 8.0 Hz, 2H), 7.02 (d, *J* = 8.0 Hz, 2H), 5.64 (s, 2H), -2.93 (s, 2H).

**TPP** was prepared in a 66% yield as a purple solid (58 mg) using **general procedure 3**. **B2** (38 mg, 0.06 mmol), **T-COOH** (0.13 g, 0.15 mmol), EDCI (0.19 g, 1 mmol), and DMAP (0.12 g, 1 mmol) were dissolved in chloroform (25 mL). 1H NMR (400 MHz, CDCl3) δ 9.05 (d, *J* = 3.2, 6H), 9.01 (d, *J* = 3.2, 2H), 8.85 (d, *J* = 6.4 Hz, 6H), 8.23 (d, *J* = 8.0, 2H), 8.16 (d, *J* = 4.8, 8H), 8.08 (d, *J* = 8.0, 2H), 7.24 (s, 2H), 4.12 (dt, *J* = 19.0, 6.4 Hz, 6H), 1.85 (dt, *J* = 33.2, 7.2 Hz, 6H), 1.54 (t, *J* = 7.6 Hz, 6H), 1.27 (d, *J* = 6.4 Hz, 72H), 0.87 (t, *J* = 6.8 Hz, 9H), -2.86 (s, 2H). 13C NMR (101 MHz, CDCl3) δ 165.90, 162.35, 153.27, 150.01, 148.05, 137.30, 135.04, 129.23, 118.34, 117.26, 105.90, 73.50, 69.46, 36.81, 31.78, 31.75, 30.21, 29.61, 29.56, 29.51, 29.46, 29.29, 29.27, 29.22, 29.20, 25.97, 22.54, 22.52, 13.94. MS: *m/z* calculated: 1458.0131; found: 1458.0150.

**TPPZn** was prepared in an overall 78% yield as a dark green solid (45 mg) using **general procedure 3**. 1H NMR (400 MHz, CD3OD) δ 9.34 (d, *J* = 6.4 Hz, 6H), 9.15-9.10 (m, 6H), 9.01 (d, *J* = 4.8 Hz, 2H), 8.92 (d, *J* = 6.4 Hz, 6H), 8.20 (q, *J* = 8.0 Hz, 4H), 7.45 (s, 2H), 4.80 (s, 9H), 4.19 (t, *J* = 6.4 Hz, 4H), 4.09 (t, *J* = 6.4 Hz, 2H), 1.88 (m, 6H), 1.61 (m, 6H), 1.30 (d, *J* = 8.4 Hz, 72H), 0.88 (q, *J* = 6.8 Hz, 9H). 13C NMR (101 MHz, CD3OD) δ 161.54, 150.22, 144.86, 136.06, 134.11, 133.35, 120.67, 70.39, 33.09, 30.88, 30.84, 30.63, 30.52, 27.41, 23.75, 14.45. MS: *m/z* calculated: 521.9966, 800.4793; found: 521.9988, 800.4860.

**TPPCo** was prepared in an 83% overall yield as a black solid (31 mg) using **general procedure 3**. MS: *m/z* calculated: 519.9954, 797.4813; found: 519.9963, 797.4794.

**TPPH2**-PF6, the free-base porphyrin, which can be easily characterized, was synthesized using the DMF solution mentioned in **general procedure 3**. NH4PF6 and H2O were added to the solution. The resulting brown precipitate was filtered, washed with distilled water and dried to give the brown solid **TPPH2**-PF6. (23 mg, yield 100%) 1H NMR (400 MHz, DMSO-*d*6) δ 10.57 (s, 1H), 9.47 (d, *J* = 6.4 Hz, 6H), 9.20-8.94 (m, 14H), 8.30-8.20 (dd, *J* = 24.8 Hz, 8.0 Hz, 4H), 7.38 (s, 2H), 4.72 (s, 9H), 4.13 (t, *J* = 6.0 Hz, 4H), 3.98 (t, *J* = 6.4 Hz, 2H), 1.80 (m, 4H), 1.71 (t, *J* = 6.6 Hz, 2H), 1.52 (m, 6H), 1.24 (d, *J* = 7.2 Hz, 72H), 0.84 (t, *J* = 7.2 Hz, 9H), -2.99 (s, 2H). 13C NMR (101 MHz, DMSO-*d*6) δ 156.60, 144.16, 134.71, 132.12, 118.83, 115.26, 106.44, 68.64, 47.84, 31.26, 29.85, 29.04, 28.99, 28.68, 25.66, 22.05, 13.86. MS: *m/z* calculated: 501.0264; found: 501.0264. **TPPH2**-Cl can be prepared from ion exchange.

**m-DPP** was prepared in 70% yield as a purple solid (66 mg) using **general procedure 3**. **B2** (49 mg, 78 μmol), **m-D-COOH** (0.12 g, 0.20 mmol), EDCI (87 mg, 0.46 mmol) and DMAP (52 mg, 0.45 mmol) were dissolved in chloroform (30 mL). 1H NMR (400 MHz, CDCl3) δ 9.29 (s, 2H), 9.05 (s, 3H), 8.99 (d, *J* = 4.8 Hz, 2H), 8.84 (m, 3H), 8.72-8.44 (m, 6H), 8.21 (s, 4H), 8.05-8.19 (dd, *J* = 37.2 Hz, 7.2 Hz, 4H), 7.12 (d, *J* = 8.4 Hz, 2H), 6.70 (s, 1H), 4.07 (t, *J* = 6.4 Hz, 4H), 1.84 (q, *J* = 7.2 Hz, 4H), 1.29 (m, 52H), 0.87 (t, *J* = 5.6 Hz, 6H), -2.86 (s, 2H). 13C NMR (101 MHz, CDCl3) δ 160.85, 148.16, 135.31, 129.52, 118.53, 117.48, 105.68, 104.92, 68.63, 32.01, 29.79, 29.75, 29.72, 29.70, 29.51, 29.45, 29.34, 26.17, 22.77, 14.20. MS: *m/z* calculated: 609.3881; found: 609.3883.

**m-DPPZn** was prepared in a 93% overall yield as a dark green solid (30 mg) using **general procedure 3**. 1H NMR (400 MHz, CD3OD) δ 9.34 (d, *J* = 6.0 Hz, 6H), 9.12 (s, 6H), 9.01 (d, *J* = 4.8 Hz, 2H), 8.92 (d, *J* = 5.2 Hz, 6H), 8.21 (q, *J* = 7.2 Hz, 4H), 7.24 (s, 2H), 6.76 (s, 1H), 4.80 (s, 9H), 4.11 (t, *J* = 8.0 Hz, 4H), 1.83 (m, 4H), 1.58-1.21 (m, 52H), 0.87 (t, *J* = 6.4 Hz, 6H). 13C NMR (101 MHz, CD3OD) δ 162.01, 161.51, 152.87, 150.21, 149.69, 144.82, 136.04, 135.21, 134.06, 133.36, 133.06, 132.29, 120.57, 116.63, 107.30, 69.44, 33.06, 30.78, 30.74, 30.67, 30.46, 30.44, 30.34, 27.15, 23.71, 14.42. MS: *m/z* calculated: 680.3567; found: 680.3571.

**m-DPPH2**-PF6, the free-base porphyrin which can be easily characterized, was prepared using the same method as above. 1H NMR (400 MHz, DMSO-*d*6) δ 10.64 (s, 1H), 9.47 (d, *J* = 6.0 Hz, 6H), 9.19-8.94 (m, 14H), 8.32 (d, *J* = 8.2 Hz, 2H), 8.21 (d, *J* = 8.2 Hz, 2H), 7.23 (s, 2H), 6.79 (s, 1H), 4.71 (s, 9H), 4.10 (t, *J* = 6.4 Hz, 4H), 1.82-1.73 (m, 4H), 1.53-1.18 (m, 52H), 0.83 (t, *J* = 6.8 Hz, 6H), -2.99 (s, 2H). 13C NMR (101 MHz, DMSO-*d*6) δ 165.70, 160.00, 156.69, 144.25, 132.21, 118.87, 115.37, 114.49, 67.93, 47.93, 31.35, 29.11, 29.07, 29.03, 28.77, 28.68, 25.57, 22.15, 14.00. MS: *m/z* calculated: 703.3976; found: 703.3975. **m-DPPH2**-Cl can be prepared from ion exchange.

**o-DPP** was prepared in a 40% yield as a purple solid (37 mg) using **general procedure 3**. **B2** (47 mg, 75 μmol), **o-D-COOH** (0.11 g, 0.17 mmol), EDCI (58 mg, 0.30 mmol), and DMAP (46 mg, 0.40 mmol) were dissolved in chloroform (30 mL). 1H NMR (400 MHz, CDCl3) δ 9.05 (t, *J* = 5.6 Hz, 6H), 8.99 (d, *J* = 5.2 Hz, 2H), 8.85 (s, 4H), 8.83 (d, *J* = 5.2 Hz, 2H), 8.24-8.13 (m, 8H), 8.08 (d, *J* = 8.4 Hz, 2H), 7.64 (d, *J* = 2.2 Hz, 1H), 7.56 (dd, *J* = 8.4, 2.2 Hz, 1H), 7.01 (d, *J* = 8.4 Hz, 1H), 4.14 (dt, *J* = 16.0, 6.6 Hz, 4H), 1.90 (m, 4H), 1.57-1.48 (m, 4H), 1.27 (d, *J* = 5.8 Hz, 48H), 0.88 (q, *J* = 6.8 Hz, 6H), -2.86 (s, 2H). 13C NMR (101 MHz, CDCl3) δ 165.93, 152.85, 150.29, 149.53, 148.45, 148.40, 138.55, 137.47, 135.37, 129.54, 127.37, 121.39, 119.94, 118.61, 117.59, 117.17, 113.29, 112.63, 69.75, 69.44, 32.08, 31.66, 31.59, 30.30, 29.88, 29.82, 29.60, 29.52, 29.44, 29.32, 26.23, 26.19, 22.84, 14.25. MS: *m/z* calculated: 1217.7678; found: 1217.7663.

**o-DPPZn** was prepared in an overall 54% yield as a dark green solid (12 mg) using **general procedure 3**. 1H NMR (400 MHz, CD­3OD) δ 9.34 (d, *J* = 5.6 Hz, 6H), 9.11 (m, 6H), 9.02 (d, *J* = 5.2 Hz, 2H), 8.91 (d, *J* = 5.6 Hz, 6H), 8.24-8.14 (q, *J* = 8.8 Hz, 4H), 7.74 (t, *J* = 12.0 Hz, 2H), 7.13 (d, *J* = 7.6 Hz, 1H), 4.80 (s, 9H), 4.17 (m, 4H), 1.87 (m, 4H), 1.59 (m, 4H), 1.30 (d, *J* = 9.6 Hz, 48H), 0.94-0.84 (m, 6H). 13C NMR (101 MHz, CD3OD) δ 161.52, 152.90, 150.22, 150.16, 149.69, 144.83, 139.36, 136.06, 135.24, 134.08, 133.37, 133.07, 132.29, 120.56, 116.64, 114.64, 70.63, 70.16, 33.12, 33.09, 30.86, 30.84, 30.82, 30.79, 30.53, 30.50, 30.41, 27.36, 23.77, 23.75, 14.47, 14.45. MS: *m/z* calculated: 680.3567, 441.9152; found: 680.3562, 441.9150.

**o-DPPH2**-PF6, the free-base porphyrin which can be easily characterized, was prepared using the same method as above.1H NMR (400 MHz, DMSO-*d*6) δ 10.53 (s, 1H), 9.47 (d, *J* = 6.4 Hz, 6H), 9.18-8.95 (m, 14H), 8.31 (d, *J* = 8.2 Hz, 2H), 8.20 (d, *J* = 8.2 Hz, 2H), 7.75 (d, *J* = 8.4 Hz, 1H), 7.67 (s, 1H), 7.18 (d, *J* = 8.4 Hz, 1H), 4.72 (s, 9H), 4.12 (q, *J* = 6.0 Hz, 4H), 1.78 (q, *J* = 7.2 Hz, 4H), 1.54-1.47 (m, 4H), 1.28 (m, 48H), 0.84 (q, *J* = 6.8 Hz, 6H), -2.98 (s, 2H). 13C NMR (101 MHz, DMSO-*d*6) δ 165.92, 157.04, 152.34, 148.57, 144.60, 140.34, 135.53, 135.17, 132.76, 132.57, 127.42, 123.42, 121.94, 119.15, 115.72, 114.83, 113.76, 113.01, 69.18, 68.84, 48.29, 48.26, 31.74, 31.72, 31.58, 30.25, 29.55, 29.51, 29.46, 29.29, 29.25, 29.16, 29.14, 26.12, 26.08, 22.53, 22.51, 14.37, 14.34. MS: *m/z* calculated: 420.6098; found: 420.6107. **o-DPPH2**-Cl can be prepared from ion exchange.

**SPP** was prepared in a 41% yield as a purple solid (24 mg) using **general procedure 3**. **B2** (38 mg, 60 μmol), **S-COOH** (50 mg, 0.14 mmol), EDCI (40 mg, 0.20 mmol), and DMAP (40 mg, 0.30 mmol) were dissolved in chloroform (25 mL). 1H NMR (400 MHz, CDCl3) δ 9.00 (m, 8H), 8.84 (s, 4H), 8.81 (d, *J* = 5.6 Hz, 2H), 8.24-8.11 (m, 10H), 8.08 (d, *J* = 8.0 Hz, 2H), 8.01 (d, *J* = 8.0 Hz, 2H), 7.07 (d, *J* = 8.8 Hz, 2H), 4.08 (t, *J* = 6.4 Hz, 2H), 1.90-1.83 (m, 2H), 1.55-1.45 (m, 2H), 1.28 (s, 24H), 0.89 (t, *J* = 7.2 Hz, 3H), -2.87 (s, 2H). 13C NMR (101 MHz, CDCl3) δ 165.65, 162.39, 150.04, 150.00, 148.26, 148.21, 138.35, 137.27, 135.19, 129.33, 129.03, 126.69, 121.20, 118.46, 117.38, 116.97, 114.63, 68.36, 31.91, 29.68, 29.59, 29.56, 29.38, 29.34, 29.13, 26.00, 22.67, 14.11. MS: *m/z* calculated: 977.5231; found: 977.5315.

**SPPZn** was prepared in an overall 84% yield as a dark green solid (7.0 mg) using **general procedure 3**. 1H NMR (400 MHz, CD3OD) δ 9.34 (d, *J* = 6.0 Hz, 6H), 9.12 (d, *J* = 5.6 Hz, 6H), 9.01 (d, *J* = 4.8 Hz, 2H), 8.92 (d, *J* = 6.0 Hz, 6H), 8.19 (q, *J* = 9.6 Hz, 4H), 8.10 (d, *J* = 8.0 Hz, 2H), 7.13 (d, *J* = 8.0 Hz, 2H), 4.80 (s, 9H), 4.13 (t, *J* = 6.4 Hz, 2H), 1.90-1.81 (m, 2H), 1.31 (s, 24H), 0.90 (t, *J* = 7.0 Hz, 3H). 13C NMR (101 MHz, CD3OD) δ 161.51, 152.90, 150.21, 150.15, 149.68, 144.81, 139.33, 136.04, 135.22, 134.06, 133.36, 133.05, 132.28, 130.77, 120.51, 116.63, 115.46, 69.37, 33.07, 30.78, 30.69, 30.47, 30.30, 27.13, 23.73, 14.43. MS: *m/z* calculated: 560.2336, 362.1664; found: 560.2336, 362.1662.

**SPPH2**-PF6, the free-base porphyrin which can be easily characterized, was prepared using the same method as above. 1H NMR (400 MHz, DMSO-*d*6) δ 10.59 (s, 1H), 9.46 (d, *J* = 6.8 Hz, 6H), 9.18-8.95 (m, 14H), 8.32 (d, *J* = 8.4 Hz, 2H), 8.21 (d, *J* = 8.4 Hz, 2H), 8.10 (d, *J* = 8.8 Hz, 2H), 7.16 (d, *J* = 8.8 Hz, 2H), 4.72 (s, 9H), 4.12 (t, *J* = 6.4 Hz, 2H), 1.78 (p, *J* = 7.4 Hz, 2H), 1.47 (m, 2H), 1.26 (s, 24H), 0.89 (t, *J* = 7.2 Hz, 3H), -2.98 (s, 2H). 13C NMR (101 MHz, DMSO *d*6) δ 165.57, 161.66, 156.66, 144.20, 139.98, 135.12, 134.79, 132.16, 129.83, 126.83, 123.05, 118.70, 115.32, 114.43, 114.27, 67.88, 47.91, 31.34, 29.08, 29.05, 29.02, 29.01, 28.79, 28.75, 28.62, 25.51, 22.14, 14.01. MS: *m/z* calculated: 340.5280; found: 340.5352. **SPPH2**-Cl can be prepared from ion exchange.

**III. Graphs and Microscopies**


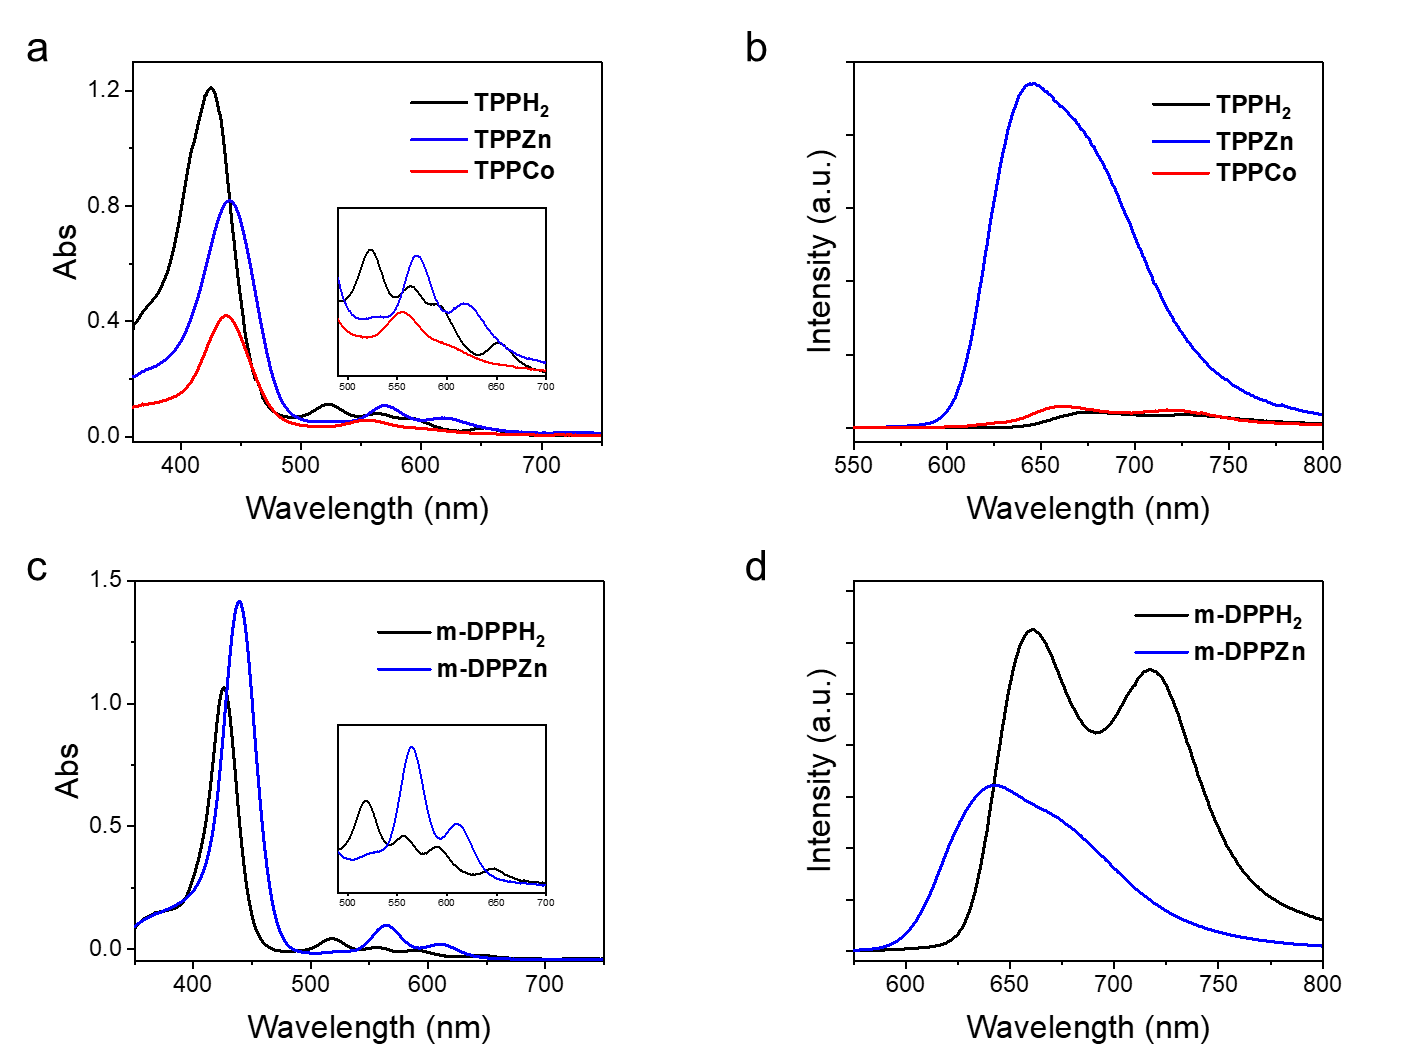


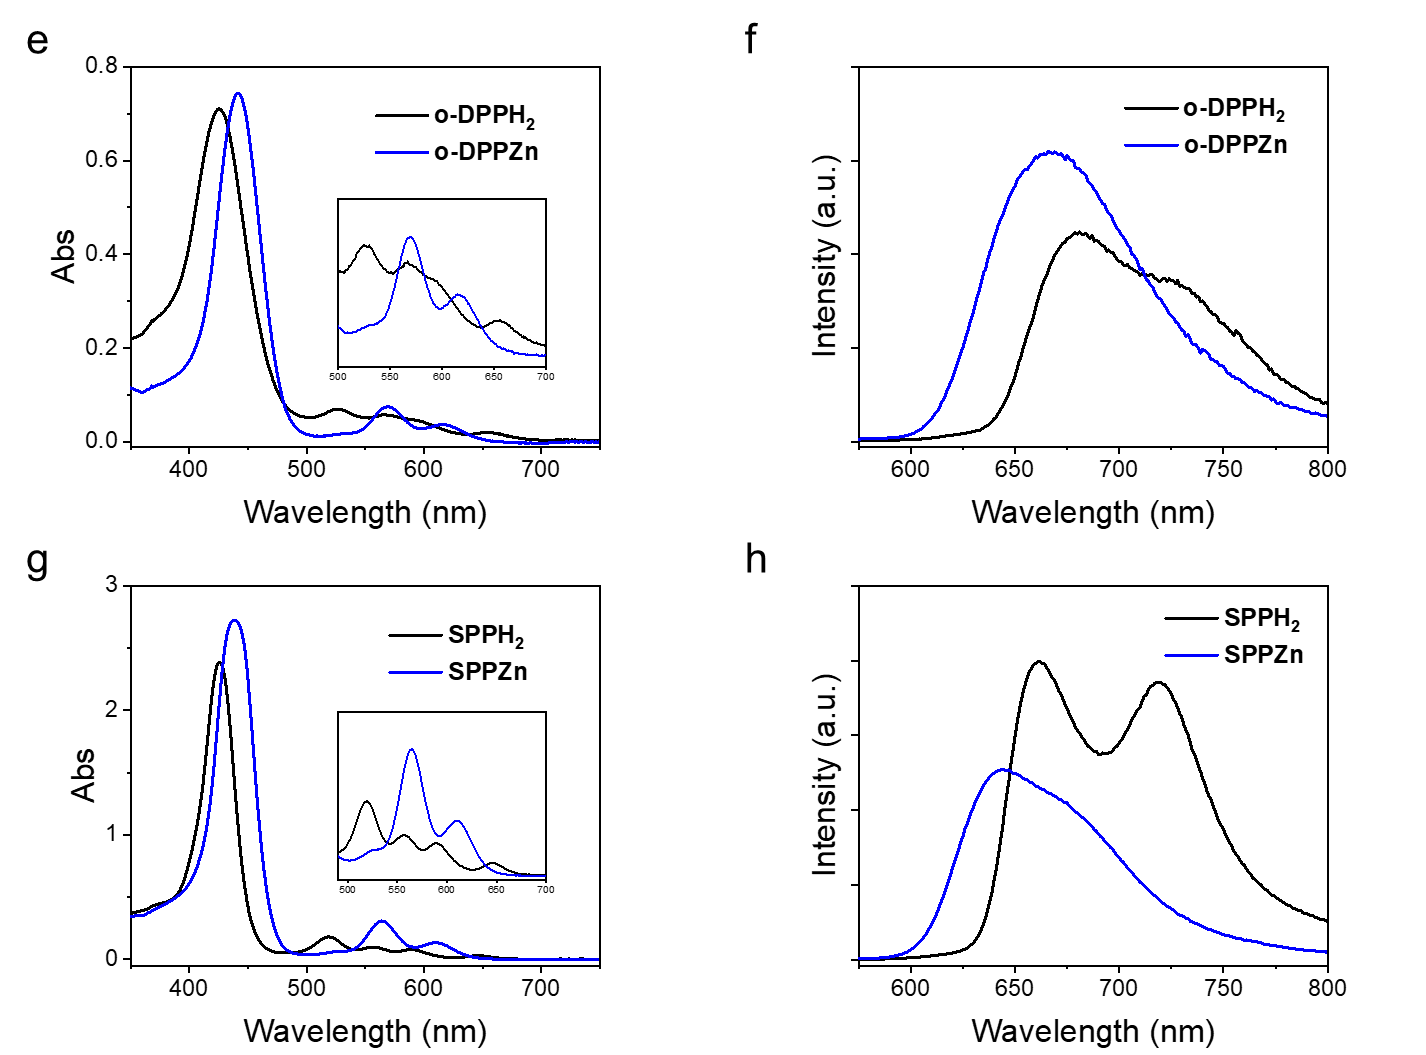


**Supplementary Fig. 1** | UV-vis spectra (a,c,e,g. Inset: magnification of Q-band absorption) and fluorescence emission spectra (b,d,f,h. Excitation wavelength: 430 nm) of 10 μM target molecules in MeOH/H2O (v/v = 1/1).


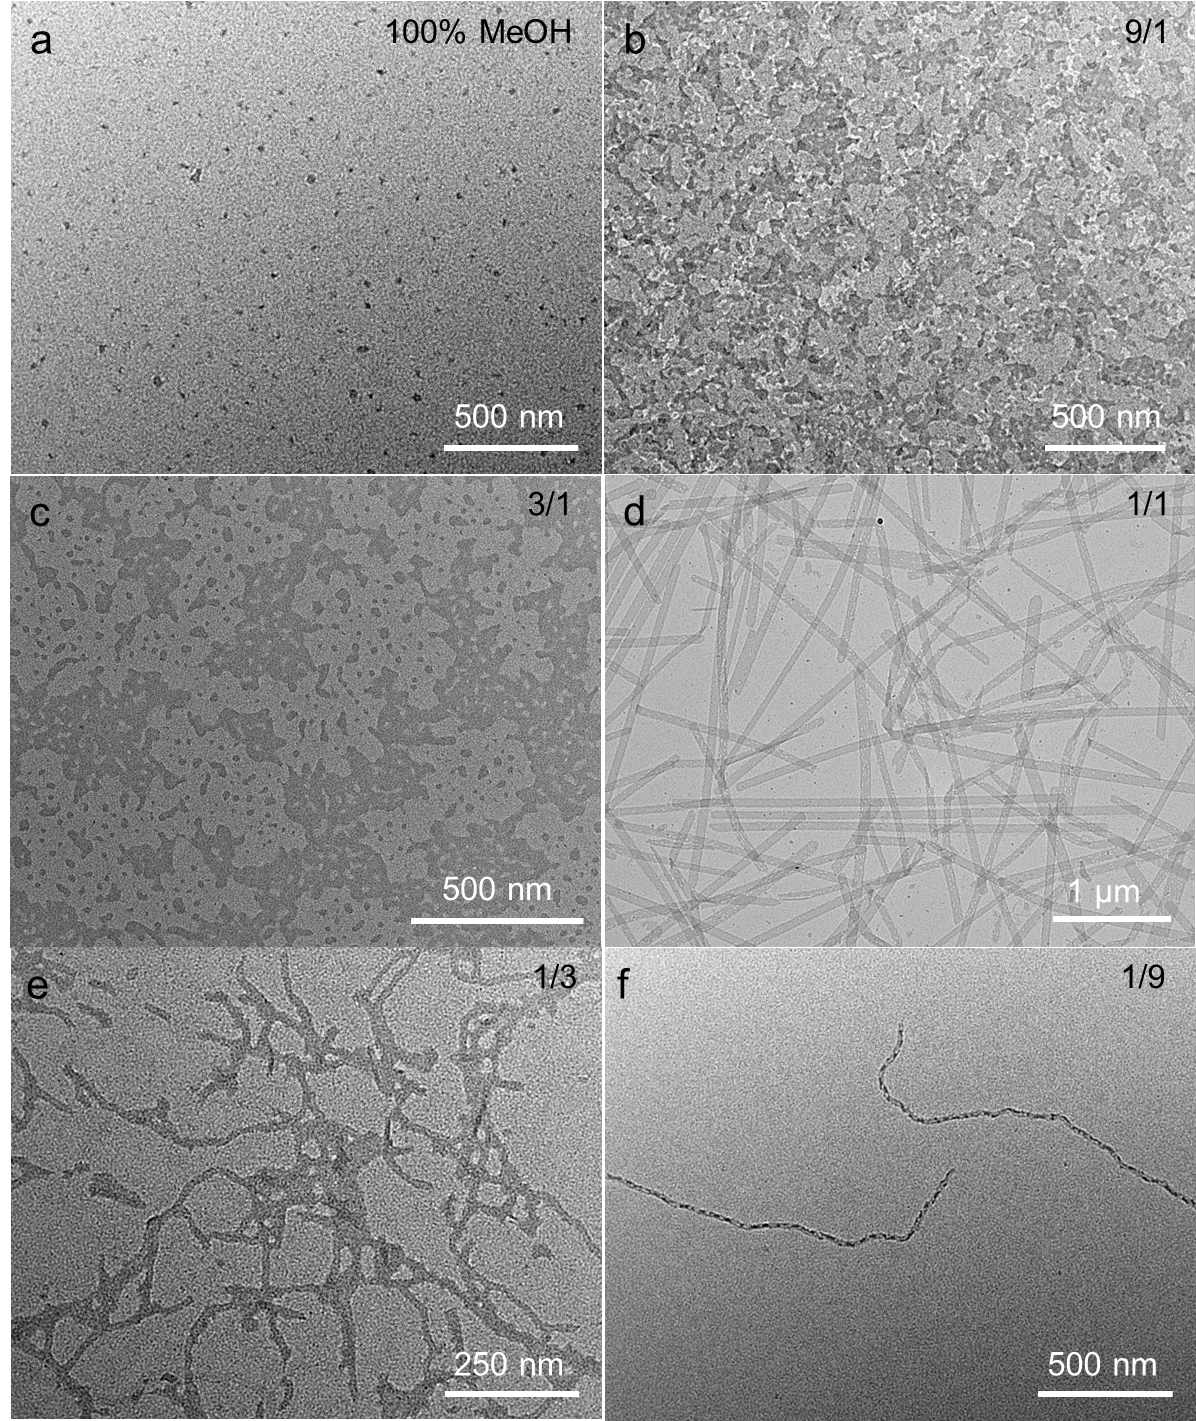


**Supplementary Fig. 2** | TEM images of the assemblies formed by annealing of 0.1 mM **TPPZn** solution at a volume ratio of MeOH to H2O of 100% (a); 9/1 (b); 3/1 (c); 1/1 (d); 1/3 (e); and 1/9 (f).


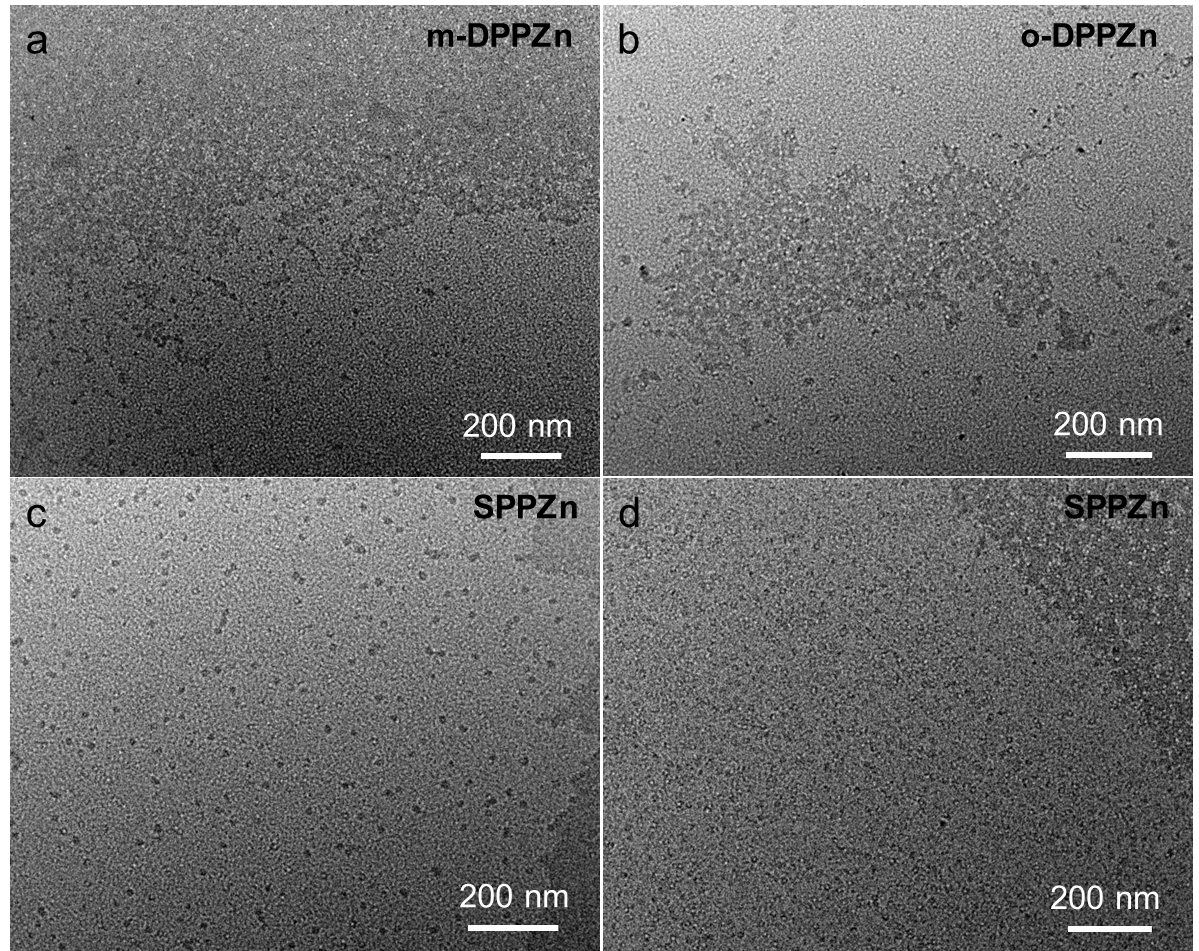


**Supplementary Fig. 3** | TEM images of the assemblies formed by annealing of 0.1 mM Zn-porphyrins in MeOH/H2O (v/v = 1/1) (a-c) or in water (d). (a) **m-DPPZn**, (b) **o-DPPZn**, (c,d) **SPPZn**.


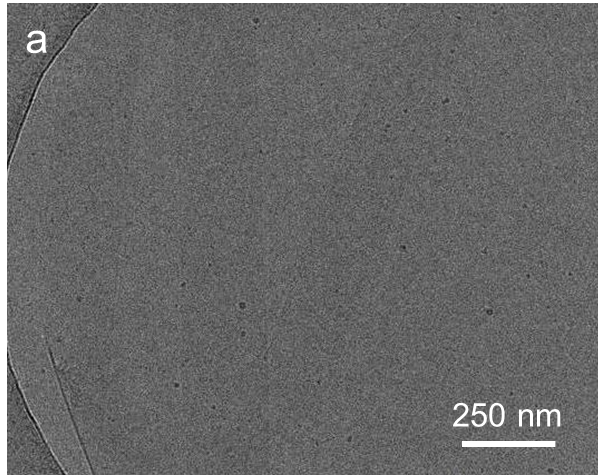


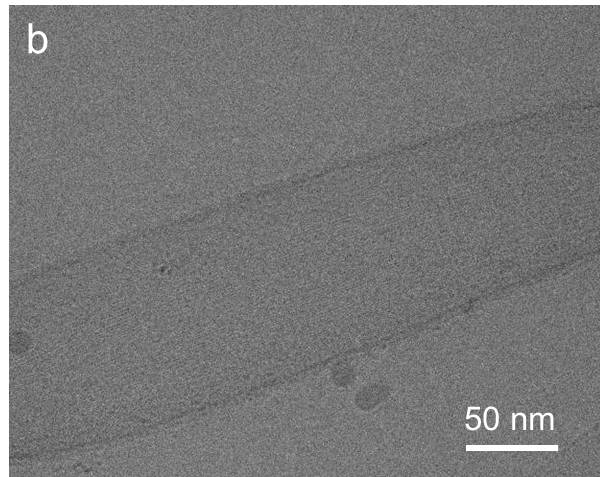


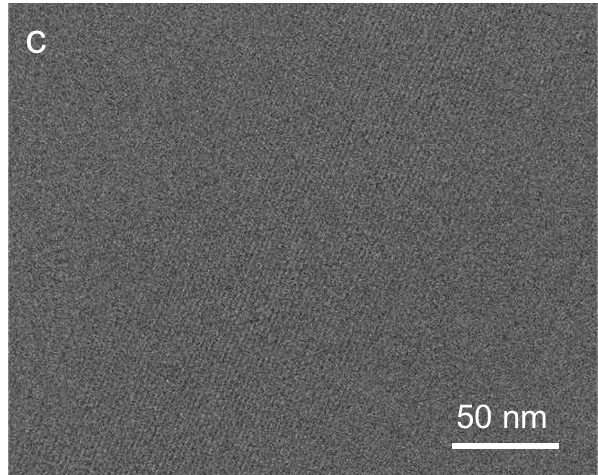


**Supplementary Fig. 4** | Cryo-TEM images of **SN** ([**TPPZn**] = 0.2 mM) in MeOH/H2O (v/v = 1/1) under the magnification of 8000 × (a) or 20,000 × (b,c).


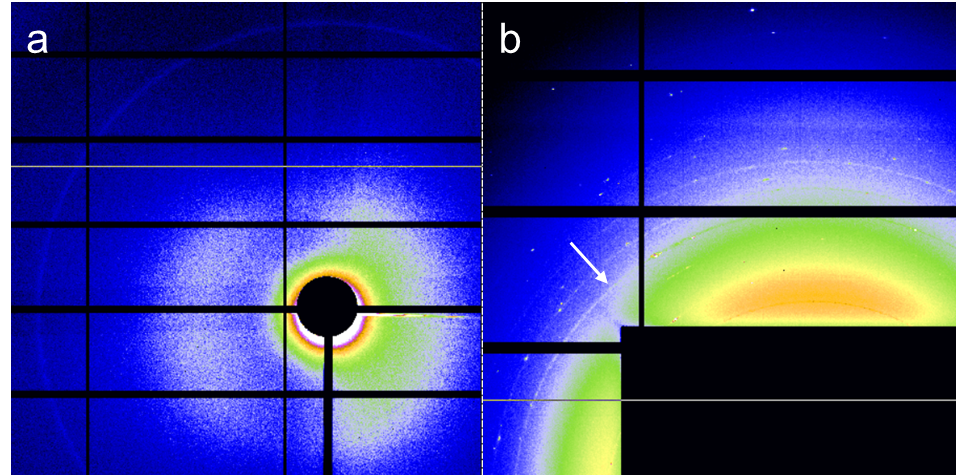


**Supplementary Fig. 5** | SAXS (a) and WAXS (b) graphs for **SN** ([**TPPZn**] = 3 mM)suspension in MeOH/H2O (v/v = 1/1).


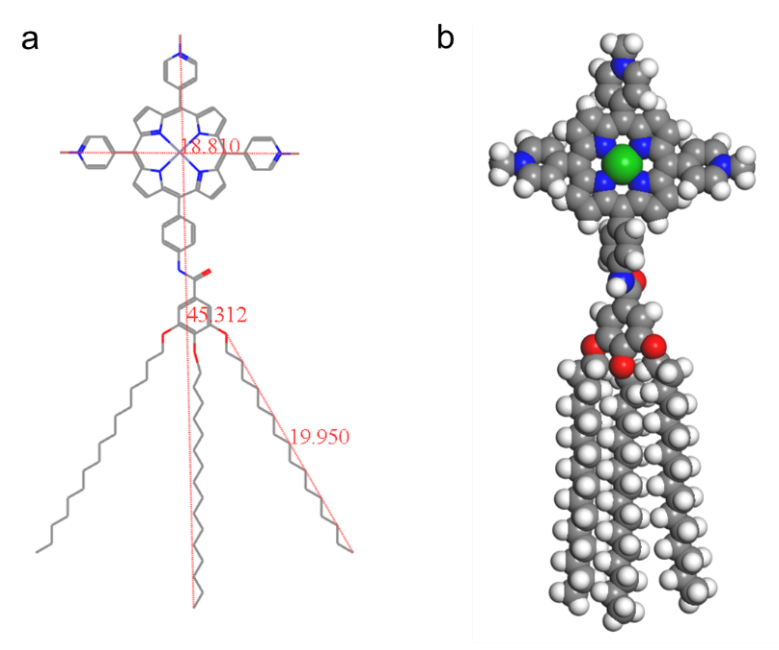


**Supplementary Fig. 6** | (a) Molecular size (unit: Å) and (b) CPK model of **TPPZn**. Atoms in colors of white, grey, blue, red, and green represent H, C, N, O, Zn, respectively.


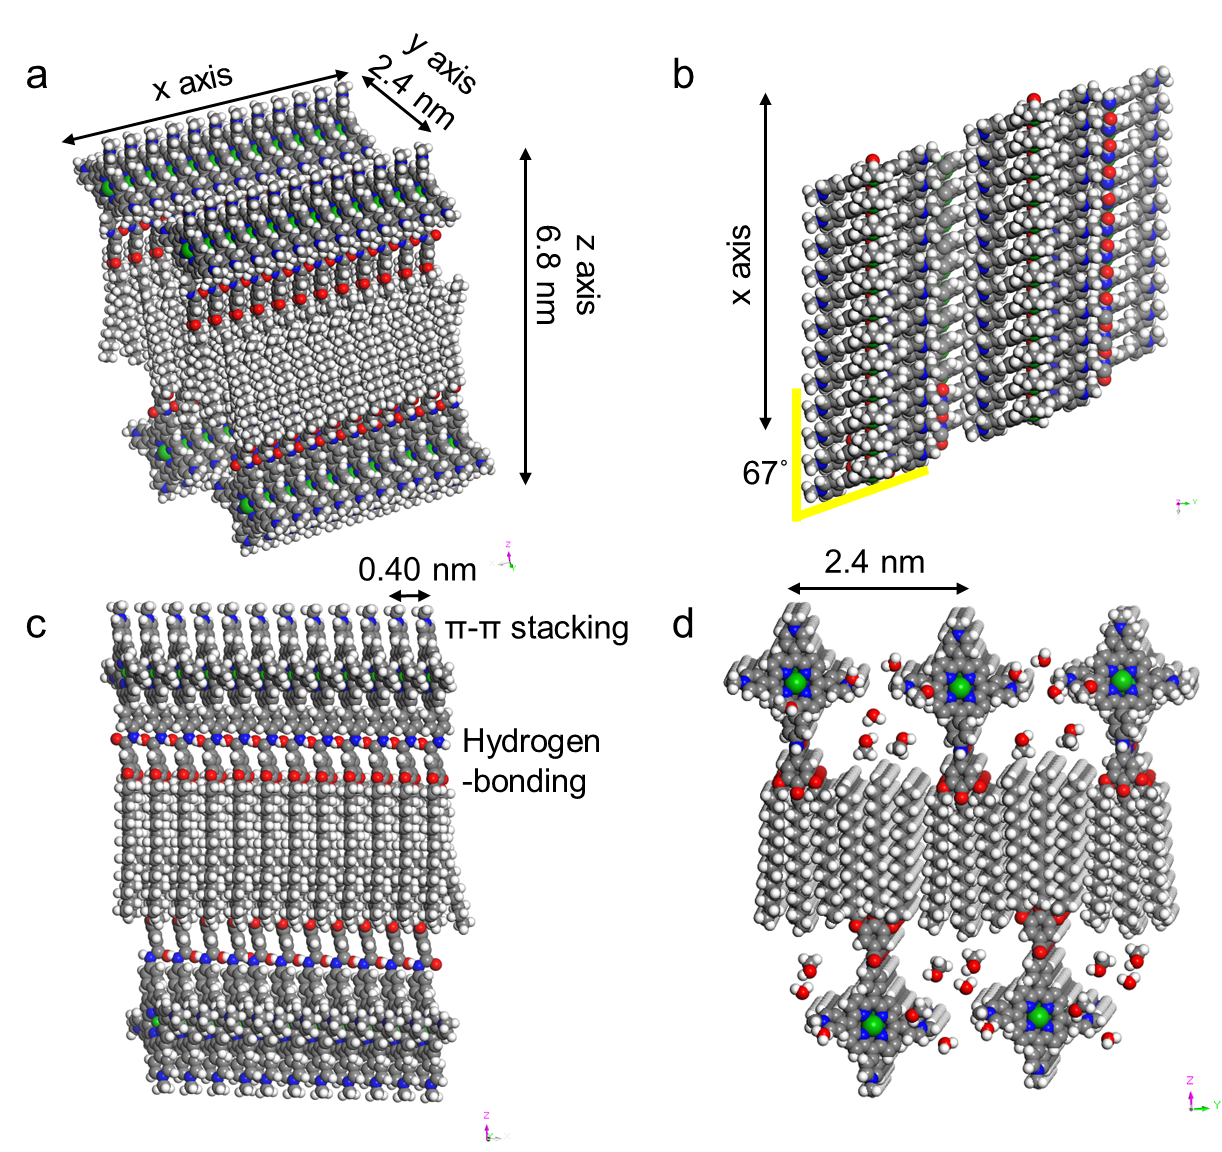


**Supplementary Fig. 7** | Proposed stacking mode of 2DZnplateletsin MeOH/H2O (v/v = 1/1) under Material Studio. (a) 3D perspective view. (b) xy plane with alkyl chains hidden. (c) xz plane. (d) yz plane with solvent molecules added.

**Supplementary Fig. 8** | UV-vis absorption spectra of 10 μM **TPPZn** in MeOH and in MeOH/H2O (v/v = 1/1).


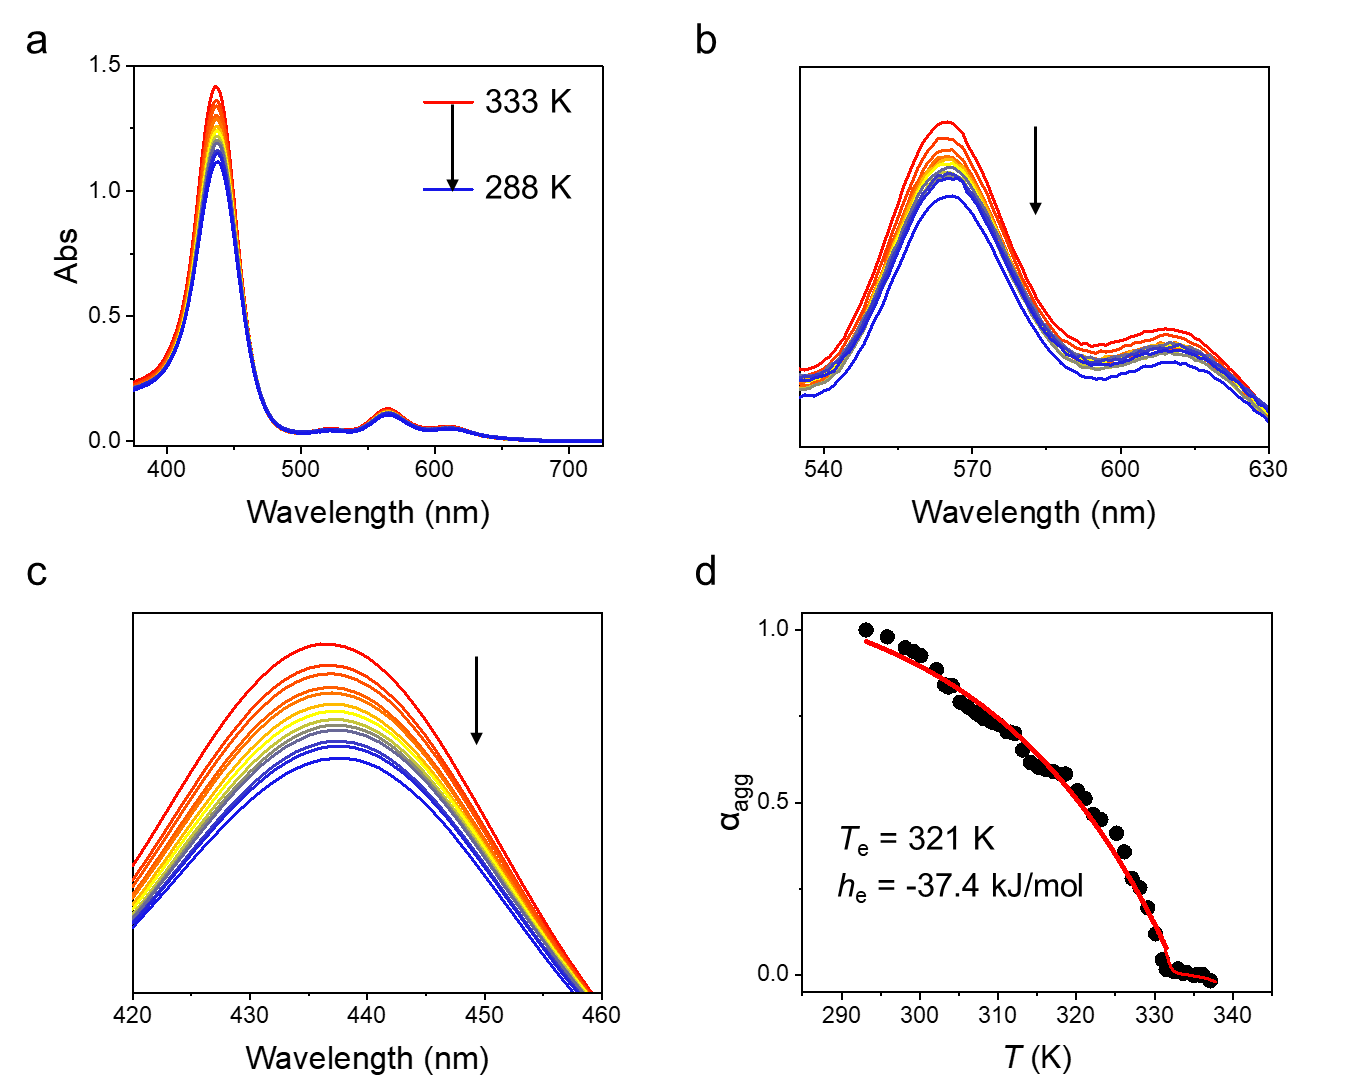


**Supplementary Fig. 9** | (a-c) Temperature-dependent UV-vis spectra and (d) cooling curve at 0.5 °C/min of **SN** ([**TPPZn**] = 10 μM in MeOH/H2O (v/v = 1/1)). (b,c) The magnification of (a) at the Soret band or Q-band of **TPPZn**.

**Supplementary Fig. 10** | Temperature-dependent SAXS integral curves of **SN** suspension ([**TPPZn**] = 3 mM in MeOH/H2O (v/v = 1/1)). The suspension was heated at 5 °C/min from 30 °C to 60 °C, cooled to room temperature, and then placed for 24 hours.


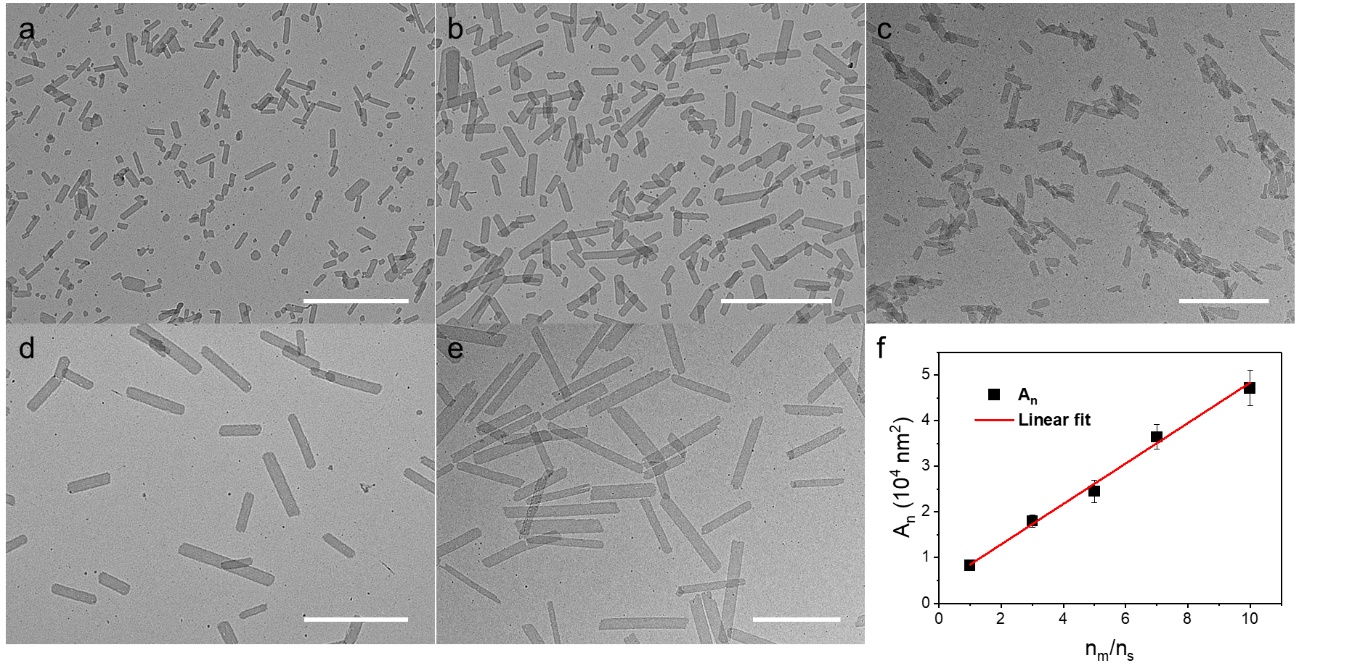


**Supplementary Fig. 11** | Paralleled seeded growth experiment of **TPPZn**. (a) Seeds formed by sonication of **SN** in the ice water bath for 30 min. (b-e) Growth of different molar ratios of monomer to seed (nm/ns) = 1, 3, 5, 7, respectively. Scalebar: 1 μm. (f) Linear dependence of the platelet area on nm/ns, An = (4.4 nm/ns + 4.1) × 103 nm2, R2 = 0.99, error bar: standard error (SE) of the average area.


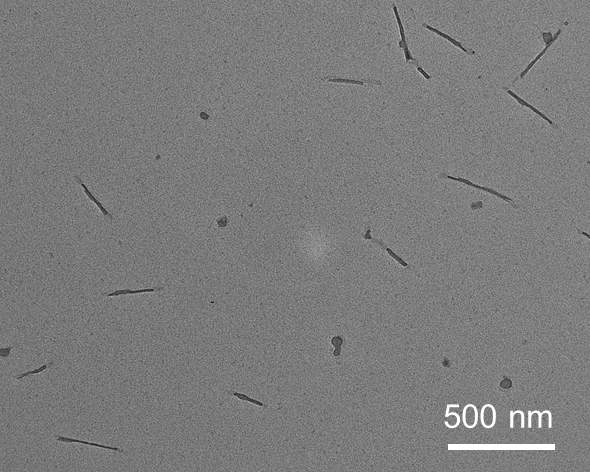


**Supplementary Fig. 12** | TEM image of the nanowires formed by 0.1 mM **TPPCo** treated by annealing at 60 °C for 30 min in MeOH/H2O (v/v = 1/1).


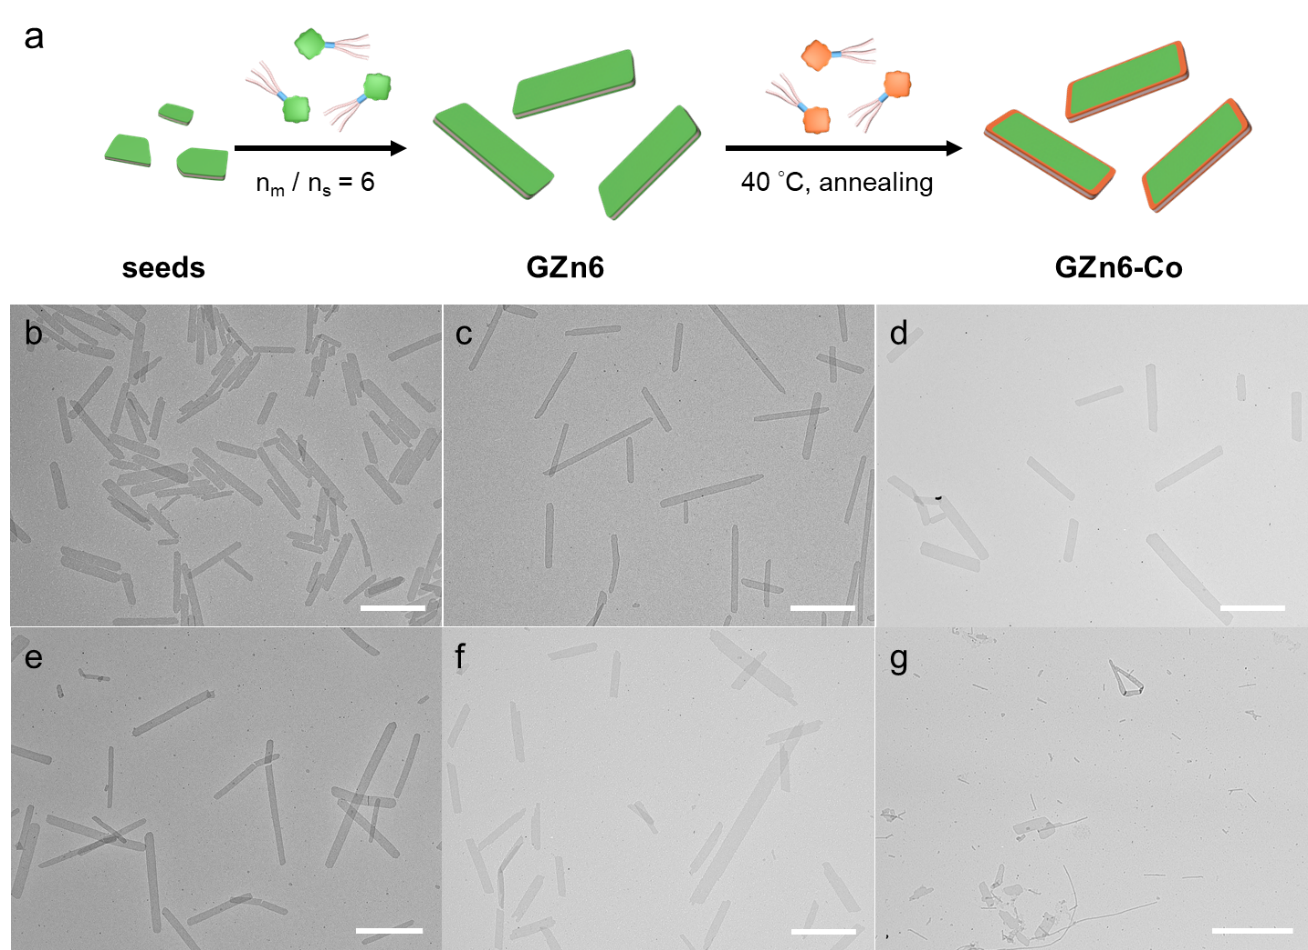


**Supplementary Fig. 13** | Schematic presentation (a) and TEM images of 2D hetero-nanostructures formed by epitaxial growth of different molar ratios of monomer to seed (Co/Zn) = 0 (b), 0.1 (c), 0.2 (d), 0.5 (e), 1 (f), 2 (g). Scalebar: 1 μm.

**Supplementary Fig. 14** | UV-vis absorption spectra of 10 μM **TPPCo** (b) in different solvents.

**
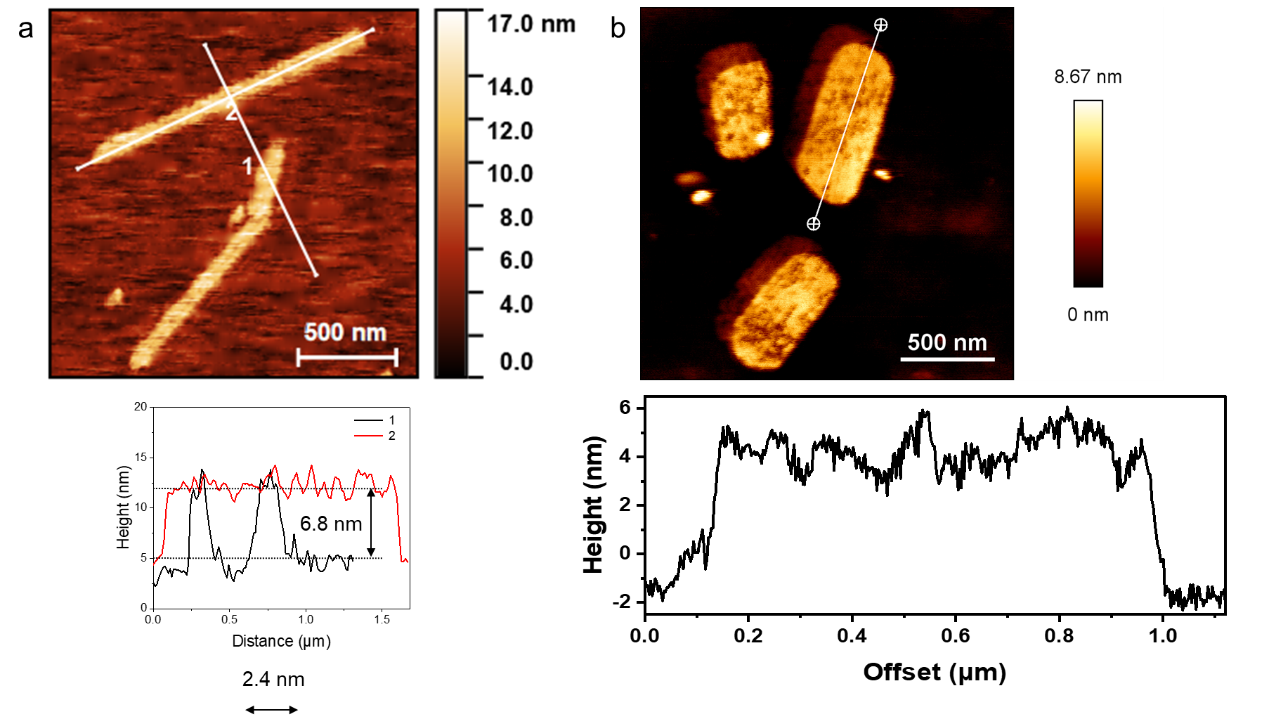
**

**Supplementary Fig. 15** | AFM image and measured height of **GZn6** (a) and **GZn6-Co0.2** (b). Samples were prepared at [**TPPZn**] = 20 μM in MeOH/H2O (v/v = 1/1).


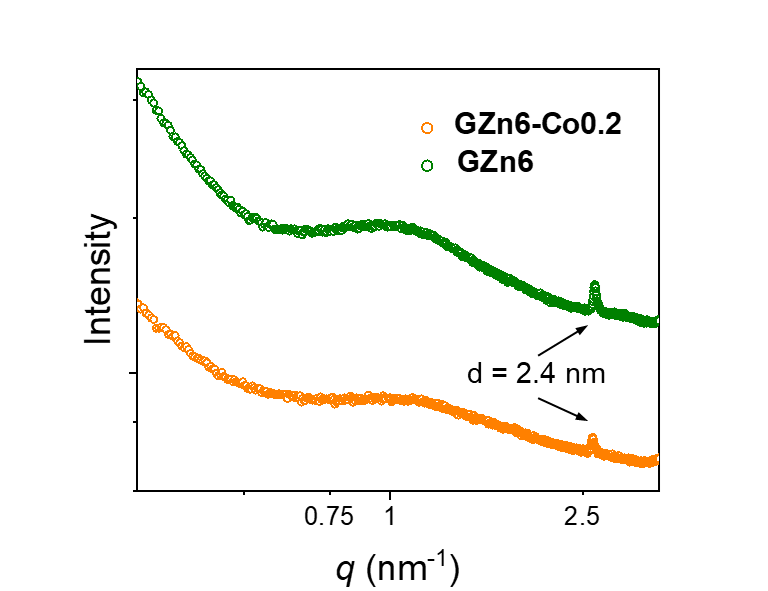


**Supplementary Fig. 16** | SAXS integral curve of **GZn6** or **GZn6-Co0.2** ([**TPPZn**] = 3 mM suspension in MeOH/H2O).


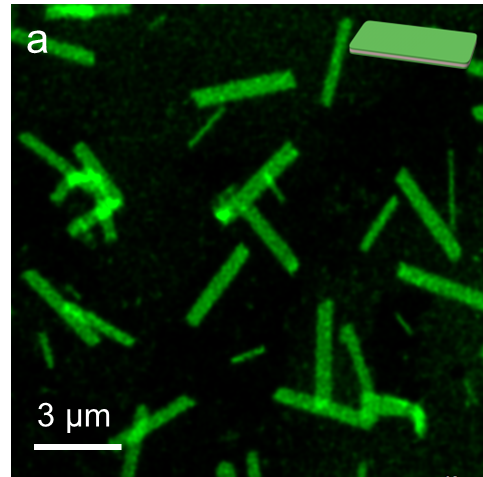


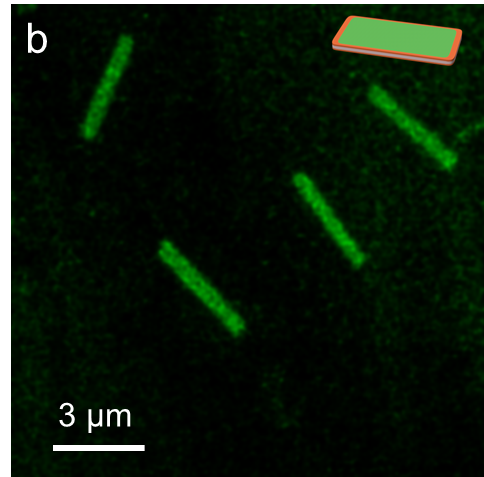


**Supplementary Fig. 17** | CLSM images of **SN** (a) or 2D heterostructures (b) at [**TPPZn**] = 10 μM in MeOH/H2O (v/v = 1/1).


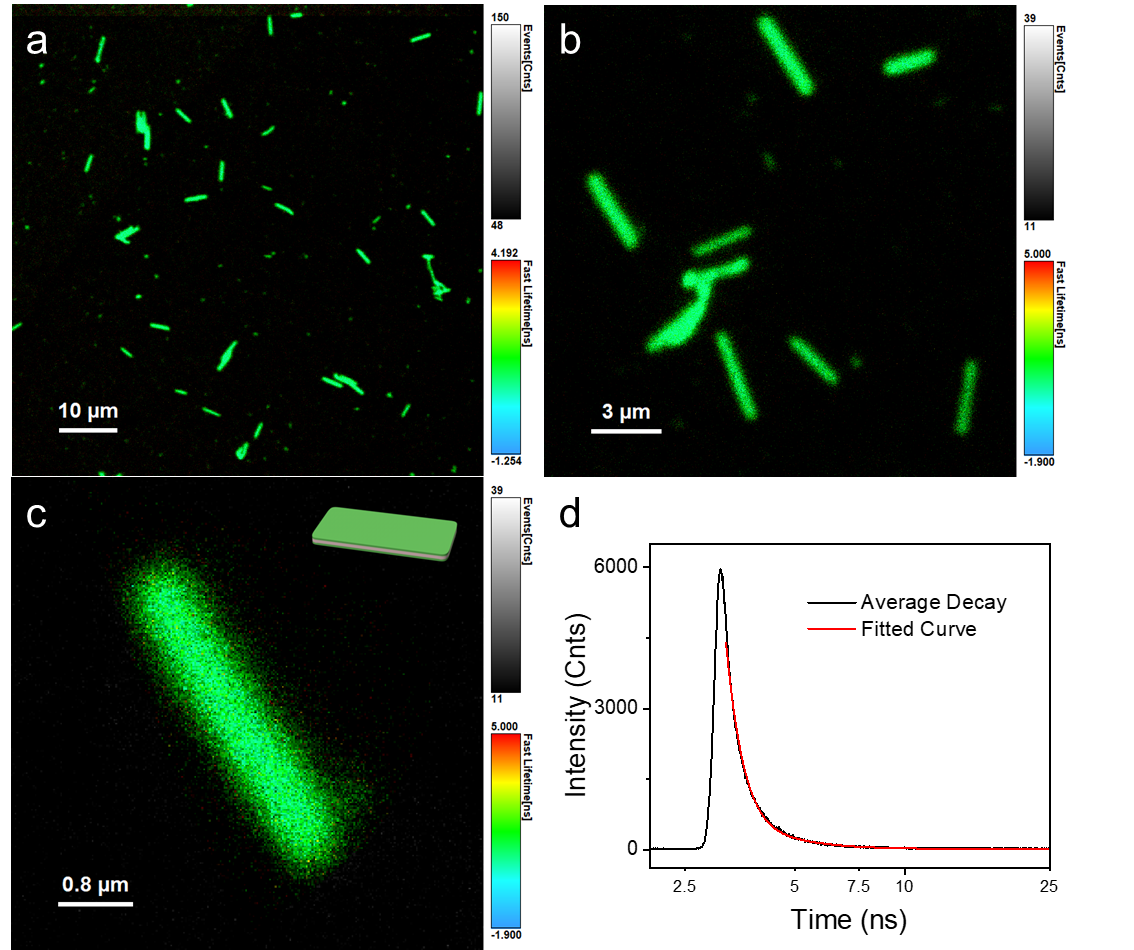


**Supplementary Fig. 18** | FLIM images (a-c) of **SN** at [**TPPZn**] = 10 μM in MeOH/H2O (v/v = 1/1). (d) Lifetime fitting of the single platelet in image c, with an average fluorescence lifetime at 2.2 ns.


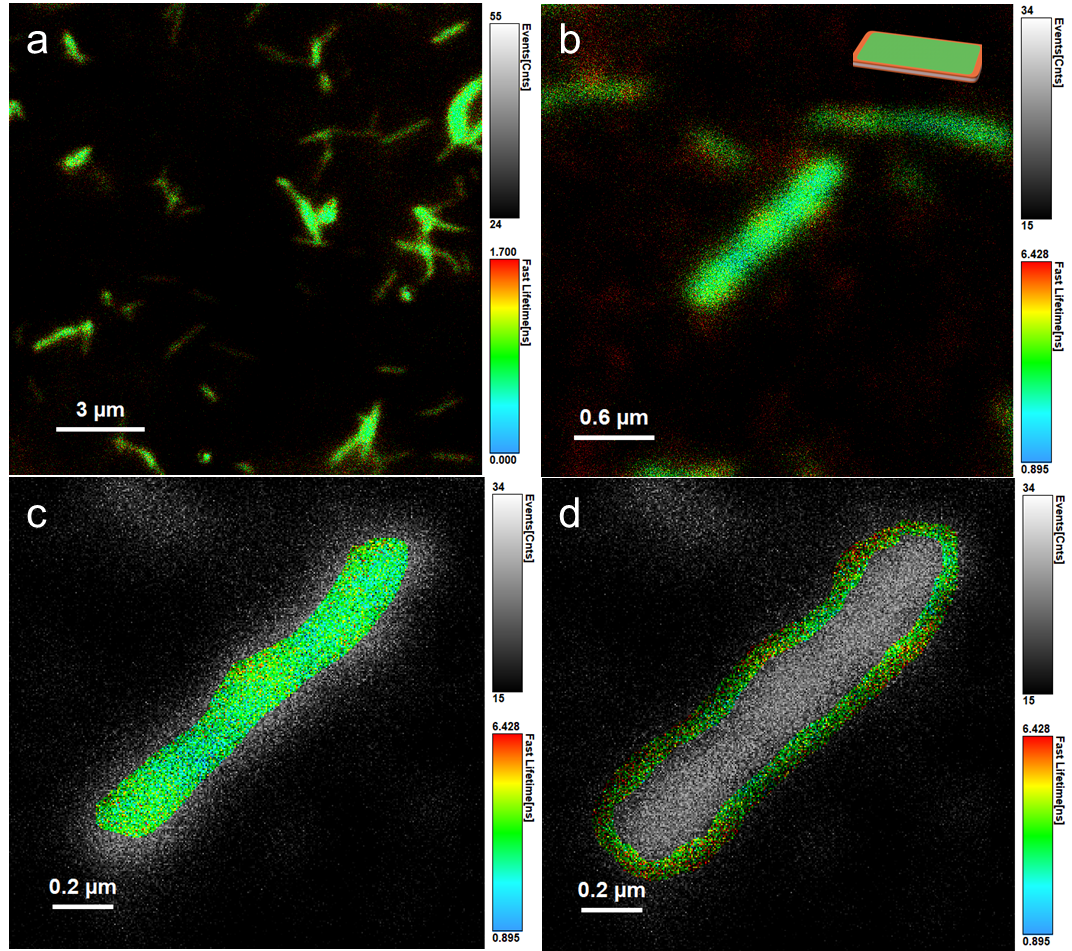


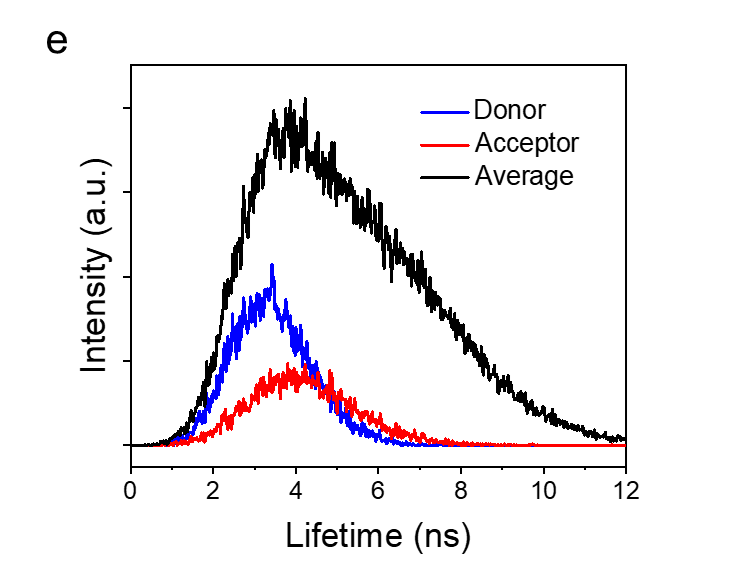


**Supplementary Fig. 19** | FLIM images (a-d) and corresponding lifetime distribution curves (e) of different parts of **GZn6-Co0.1** (Co/Zn = 0.1, [**TPPZn**] = 20 μM in MeOH/H2O (v/v = 1/1)). Donor (blue line), acceptor (red line), and average (black line) represent the inner part (c), the outer part (d), and the entire assembly (b), respectively.


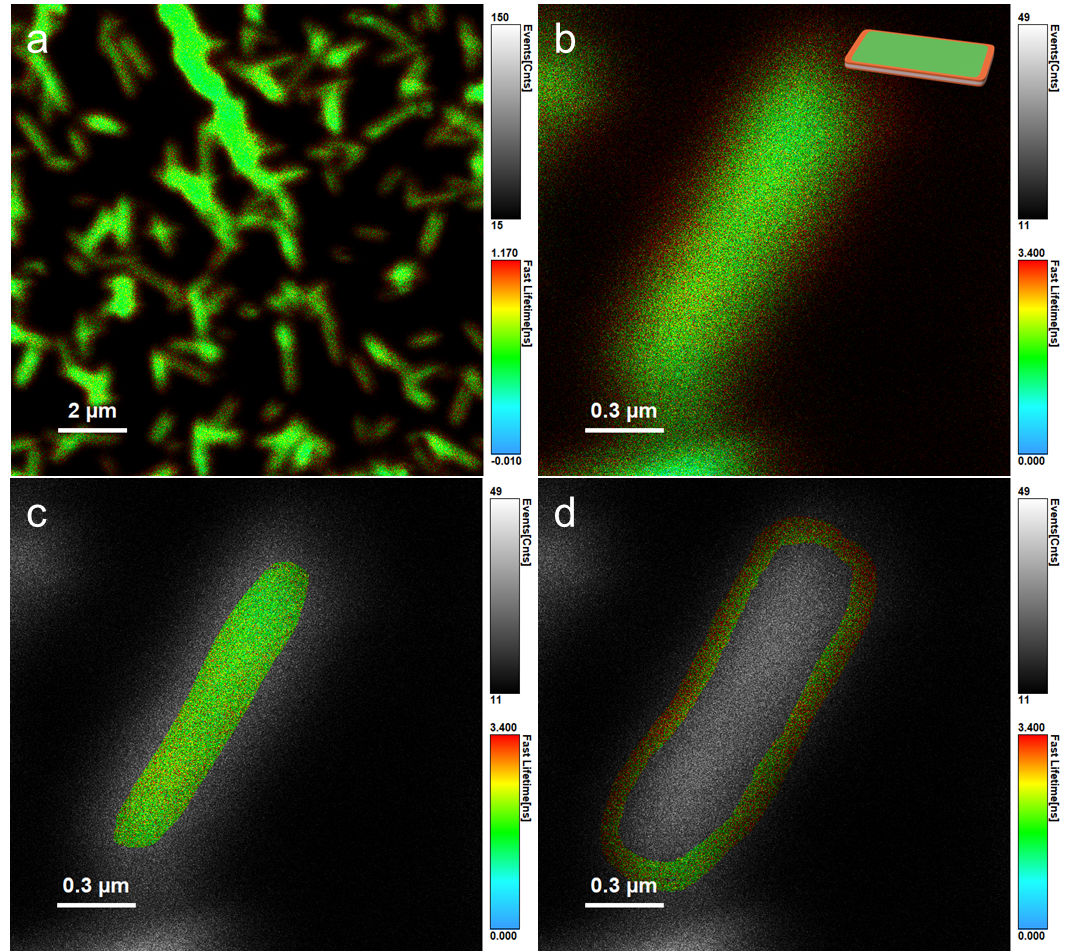


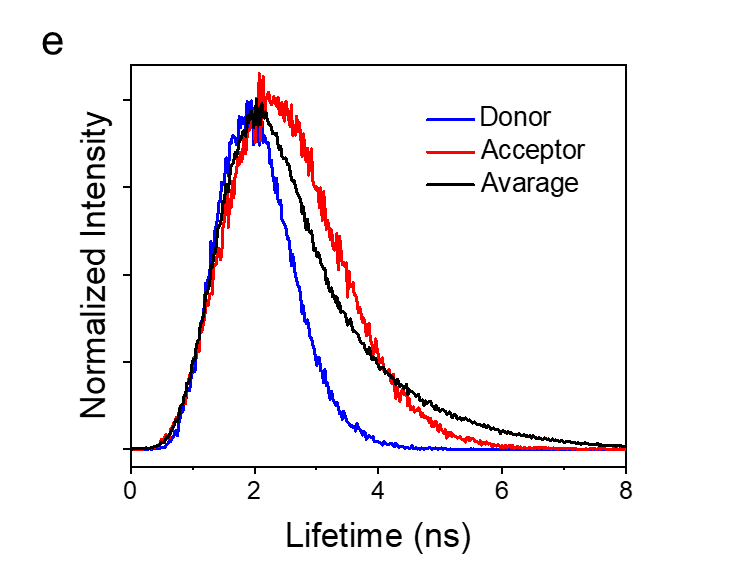


**Supplementary Fig. 20** | FLIM images (a-d) and corresponding lifetime distribution curves (e) of different parts of **GZn6-Co0.2** (Co/Zn = 0.2, [**TPPZn**] = 20 μM in MeOH/H2O (v/v = 1/1) with 2% w/v DABCO). Donor (blue line), acceptor (red line), and average (black line) represent the inner part (c), the outer part (d), and the entire assembly (b), respectively.


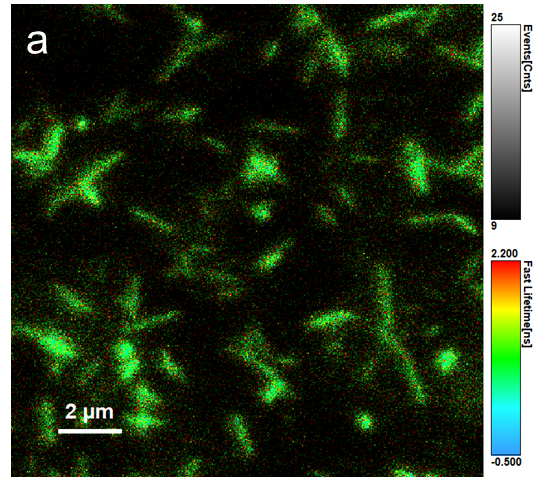


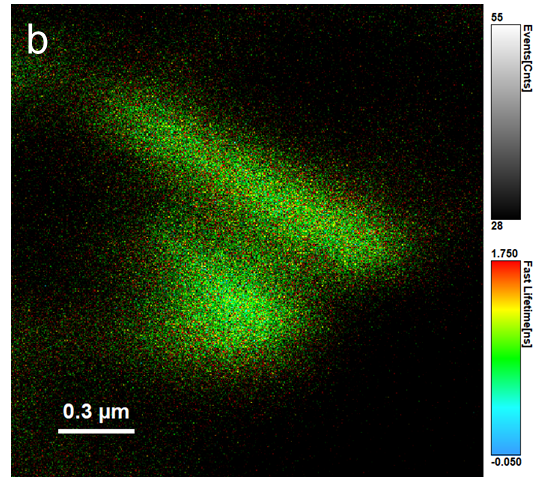


**Supplementary Fig. 21** | FLIM images of **GZn6-Co0.5** (Co/Zn = 0.5, [**TPPZn**] = 20 μM in MeOH/H2O (v/v = 1/1) with 2% w/v DABCO). Fluorescence intensity was too low to fit a lifetime precisely.


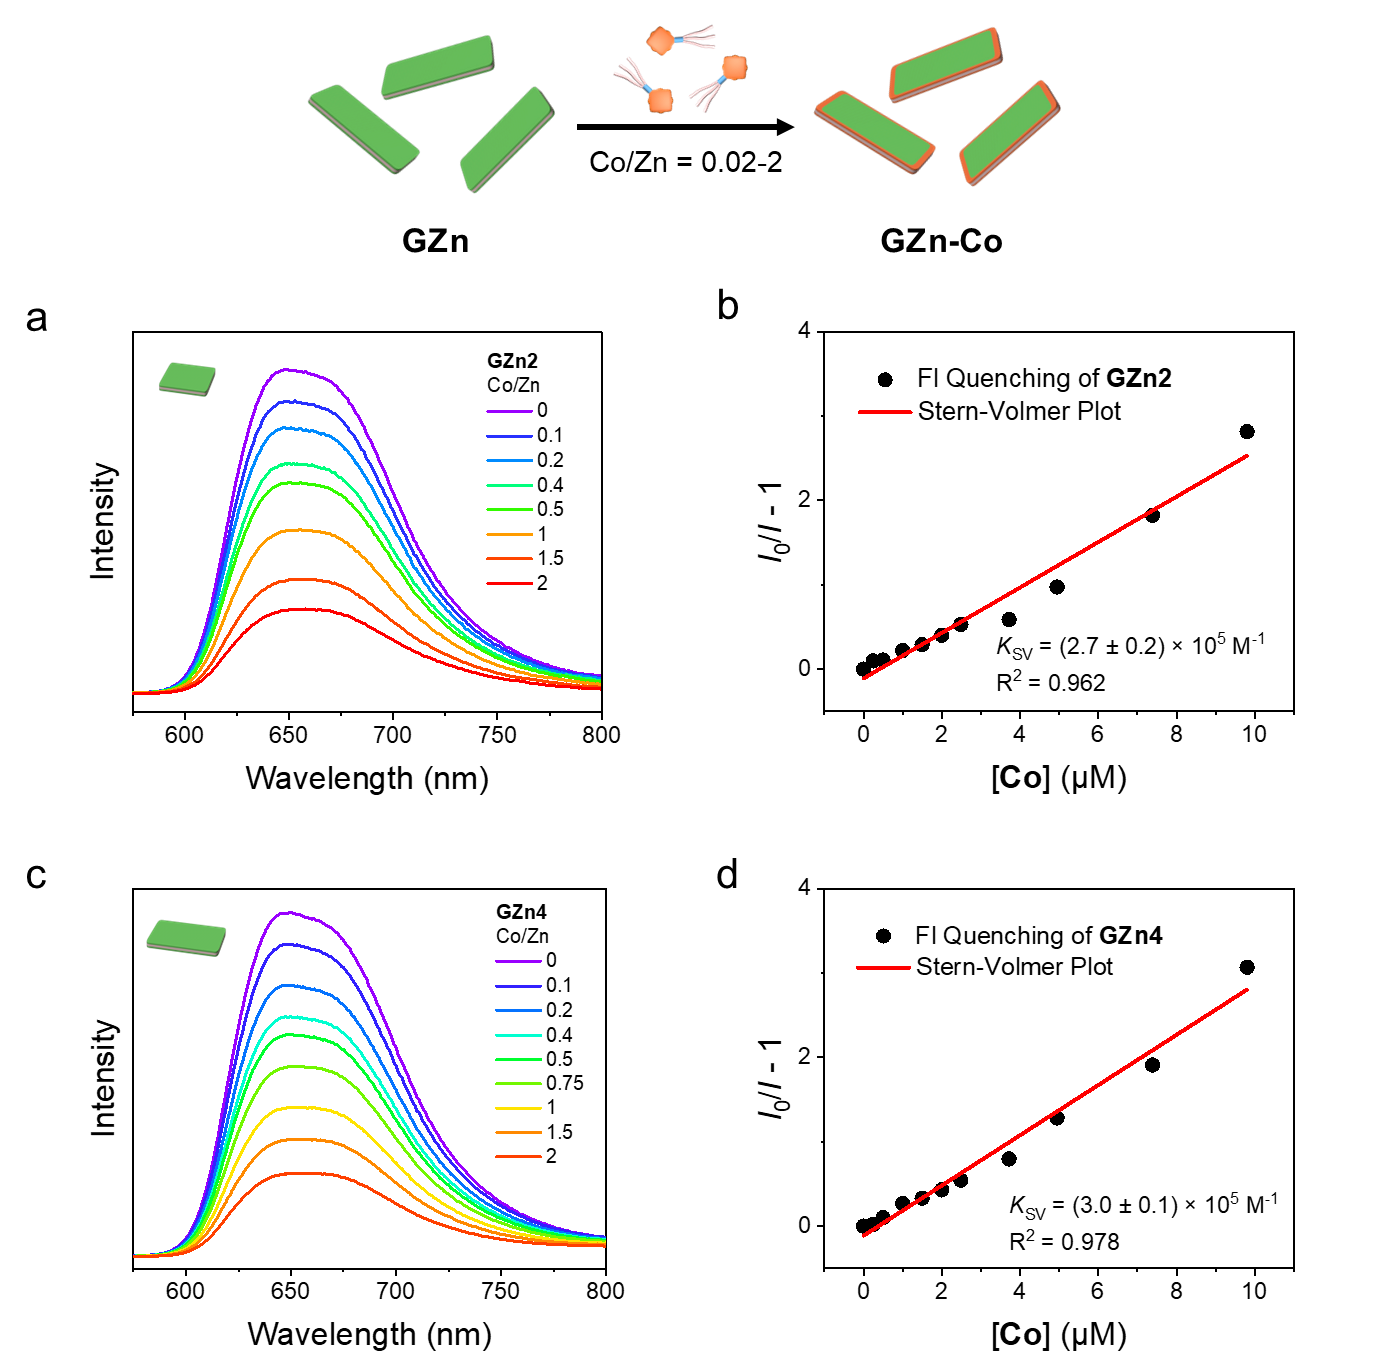


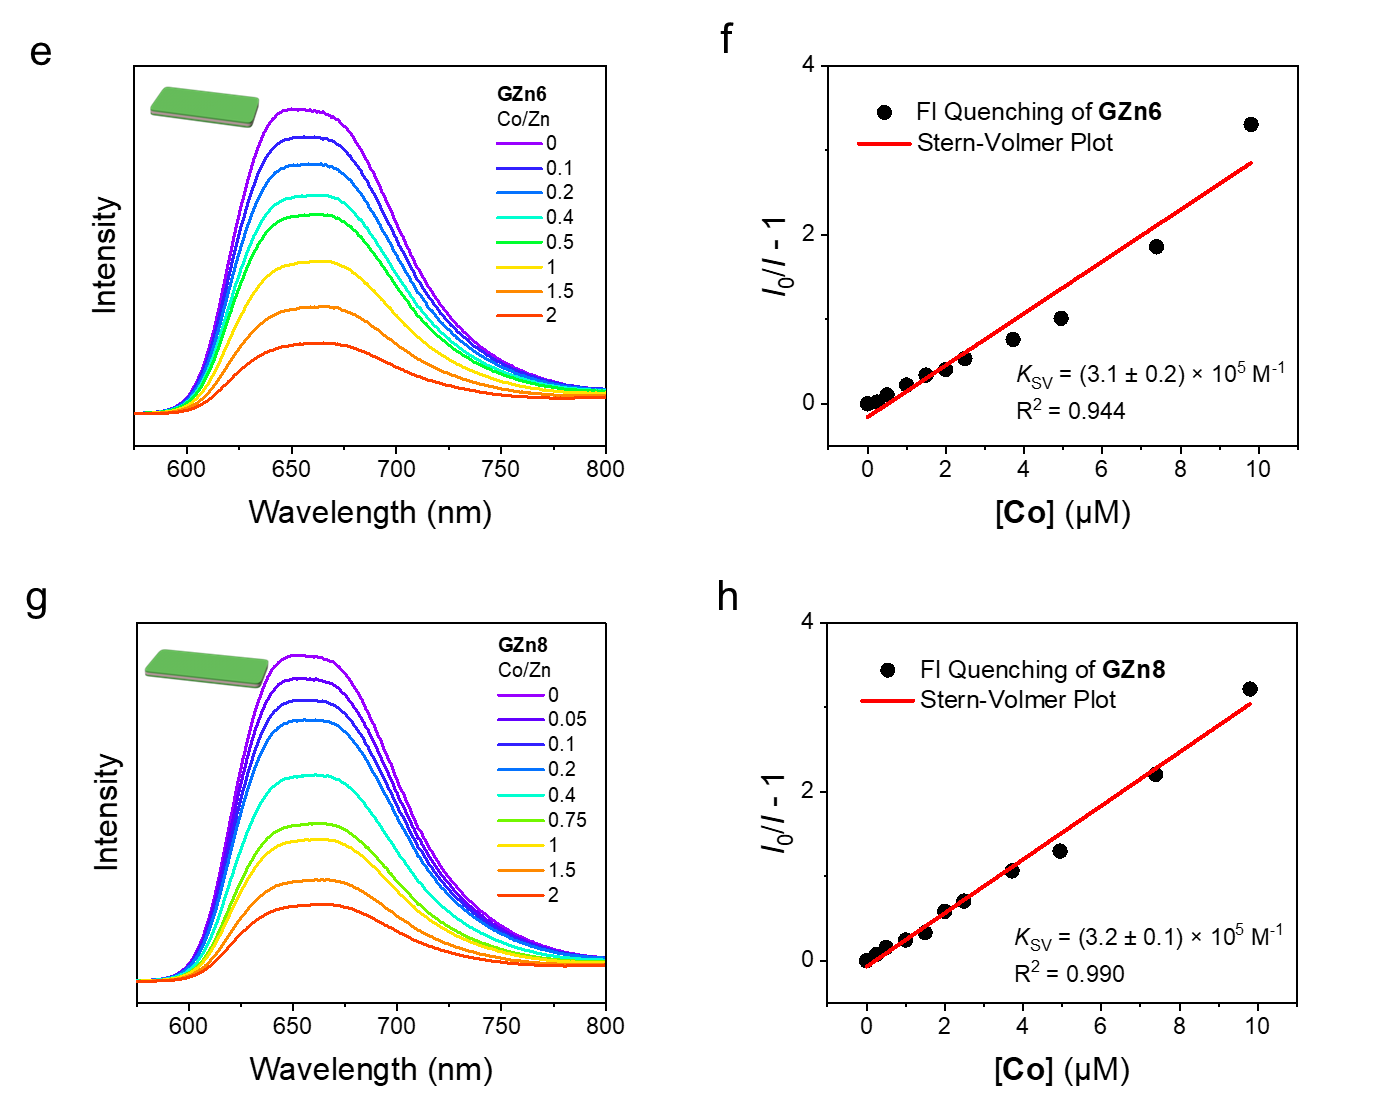


**Supplementary Fig. 22** | Fluorescence quenching and Stern-Volmer analysis of 2D heterostructures. The donor was prepared by seeded growth in Fig. 3 and diluted to 5 μM in MeOH/H2O (v/v = 1/1).The acceptor solution contained of 0.1 mM **TPPCo** and 5 μM **TPPZn** in MeOH. (a,b) **GZn2**. (c,d) **GZn4**. (e,f) **GZn6**. (g,h) **GZn8**.


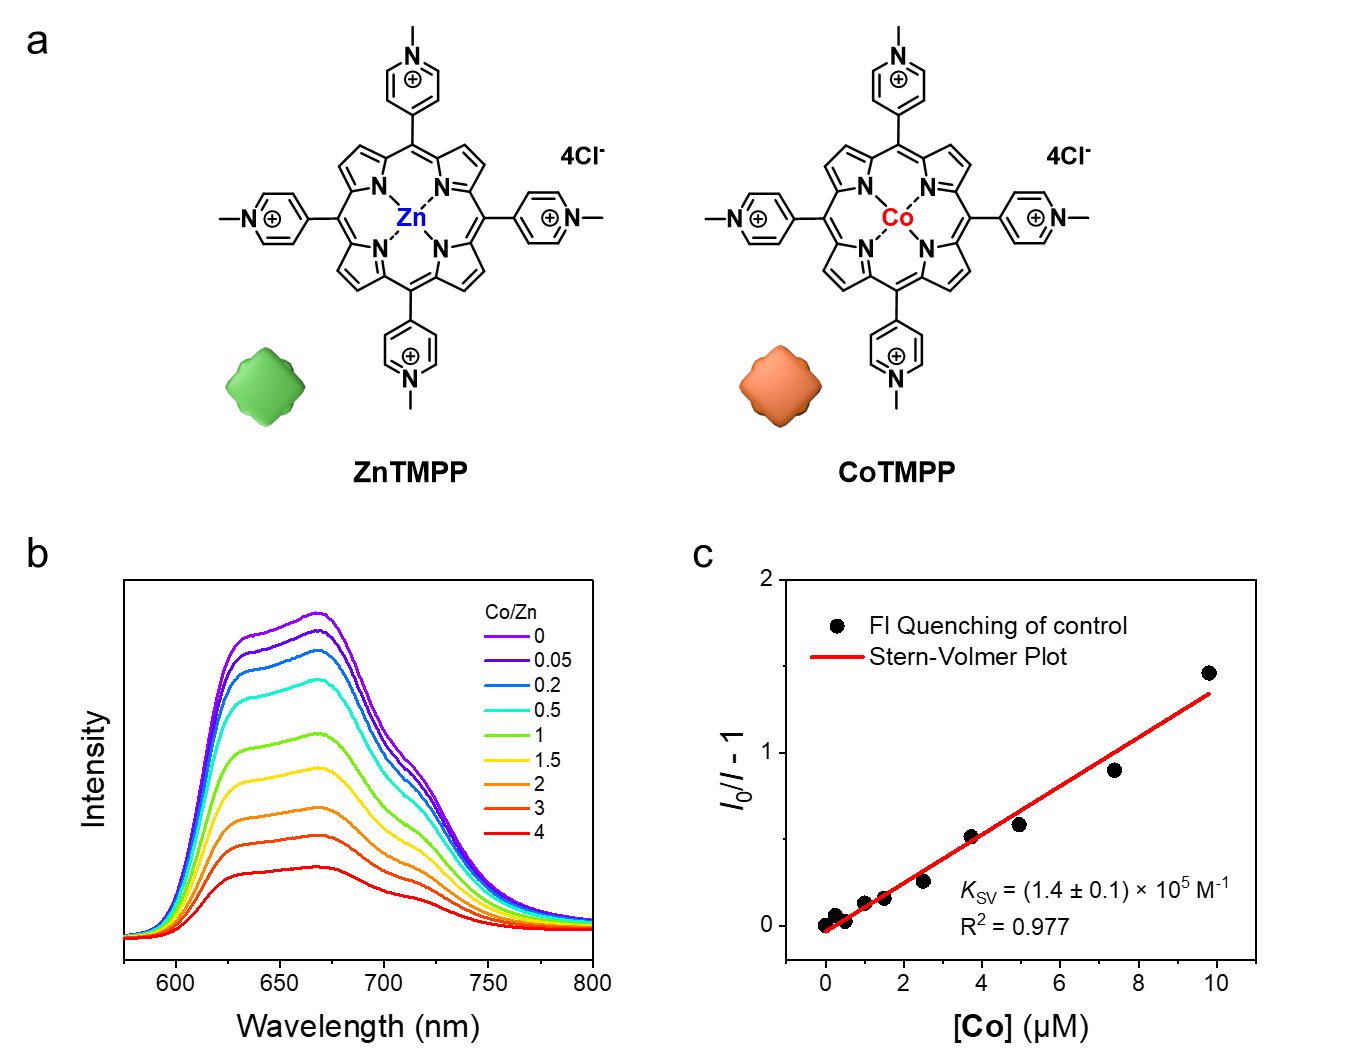


**Supplementary Fig. 23** | (a) Chemical structure of cationic free molecules for the control of porphyrins without the formation of molecular arrays. (b) Fluorescence quenching emission spectra and (c) Stern-Volmer analysis of the free molecules. **ZnTMPP** was dissolved at 5 μM in MeOH/H2O (v/v = 1/1). The acceptor solution contained 0.1 mM **CoTMPP** and 5 μM **ZnTMPP** in MeOH.


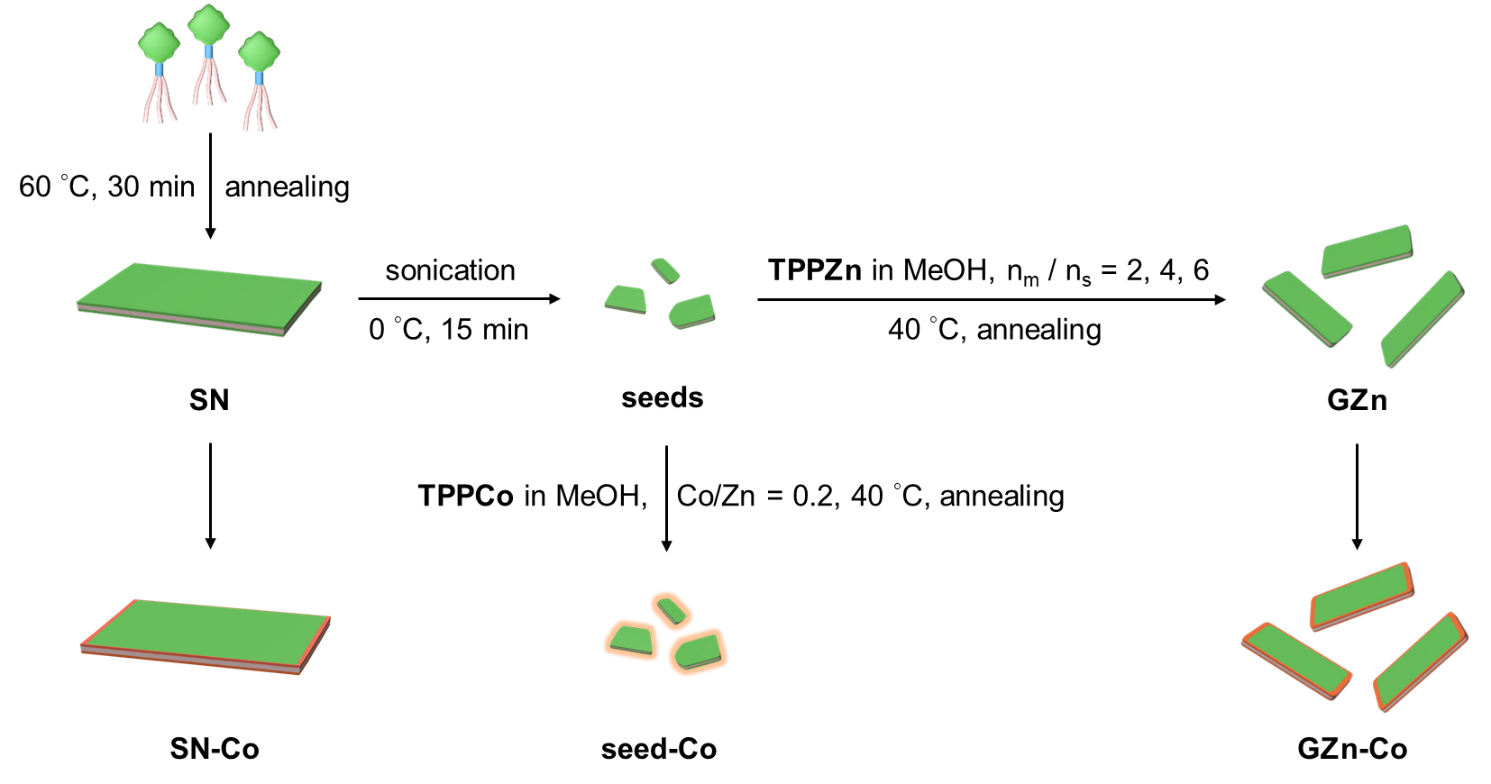


**Supplementary Fig. 24** | Graphical presentation of samples for femtosecond transient absorption spectra (fs-TAS). **SN** formed by self-nucleation had the largest An. Seeds prepared by sonication of **SN** obtained the smallest An and the highest PDI. **GZn** and 2Dheterostructures (Co/Zn = 0.2) were prepared by seeded growth and epitaxial growth, as mentioned in Fig. 3 and Fig. 4. Samples were prepared at [**TPPZn**] = 30 μM in MeOH/H2O (v/v = 1/1).


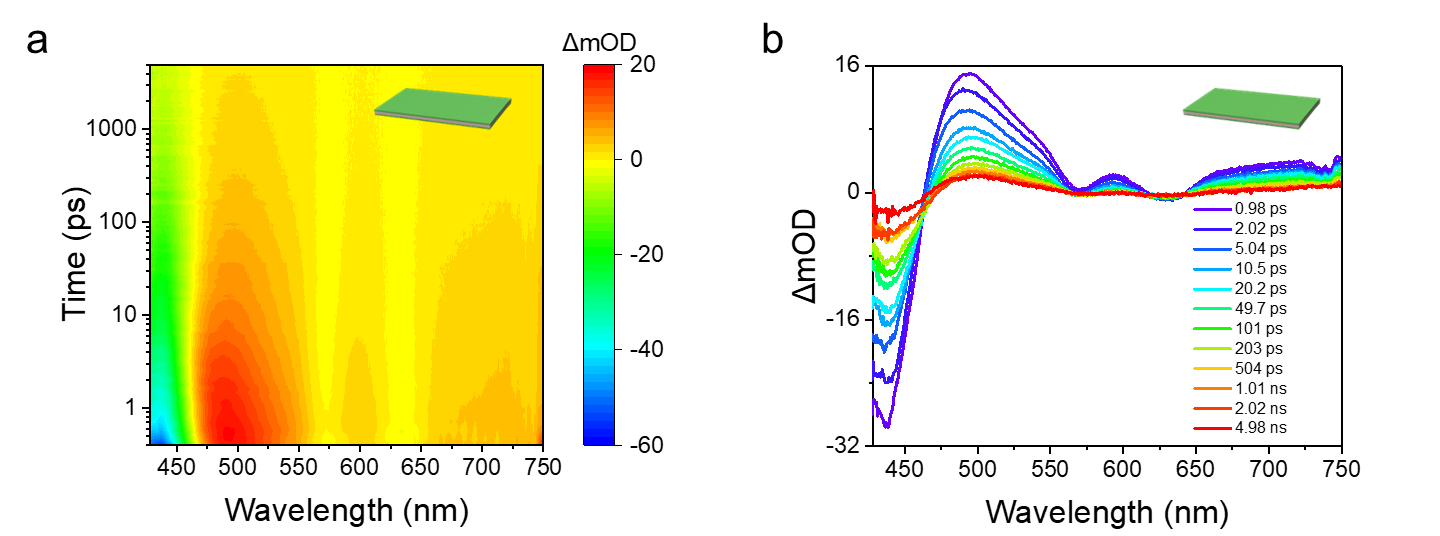


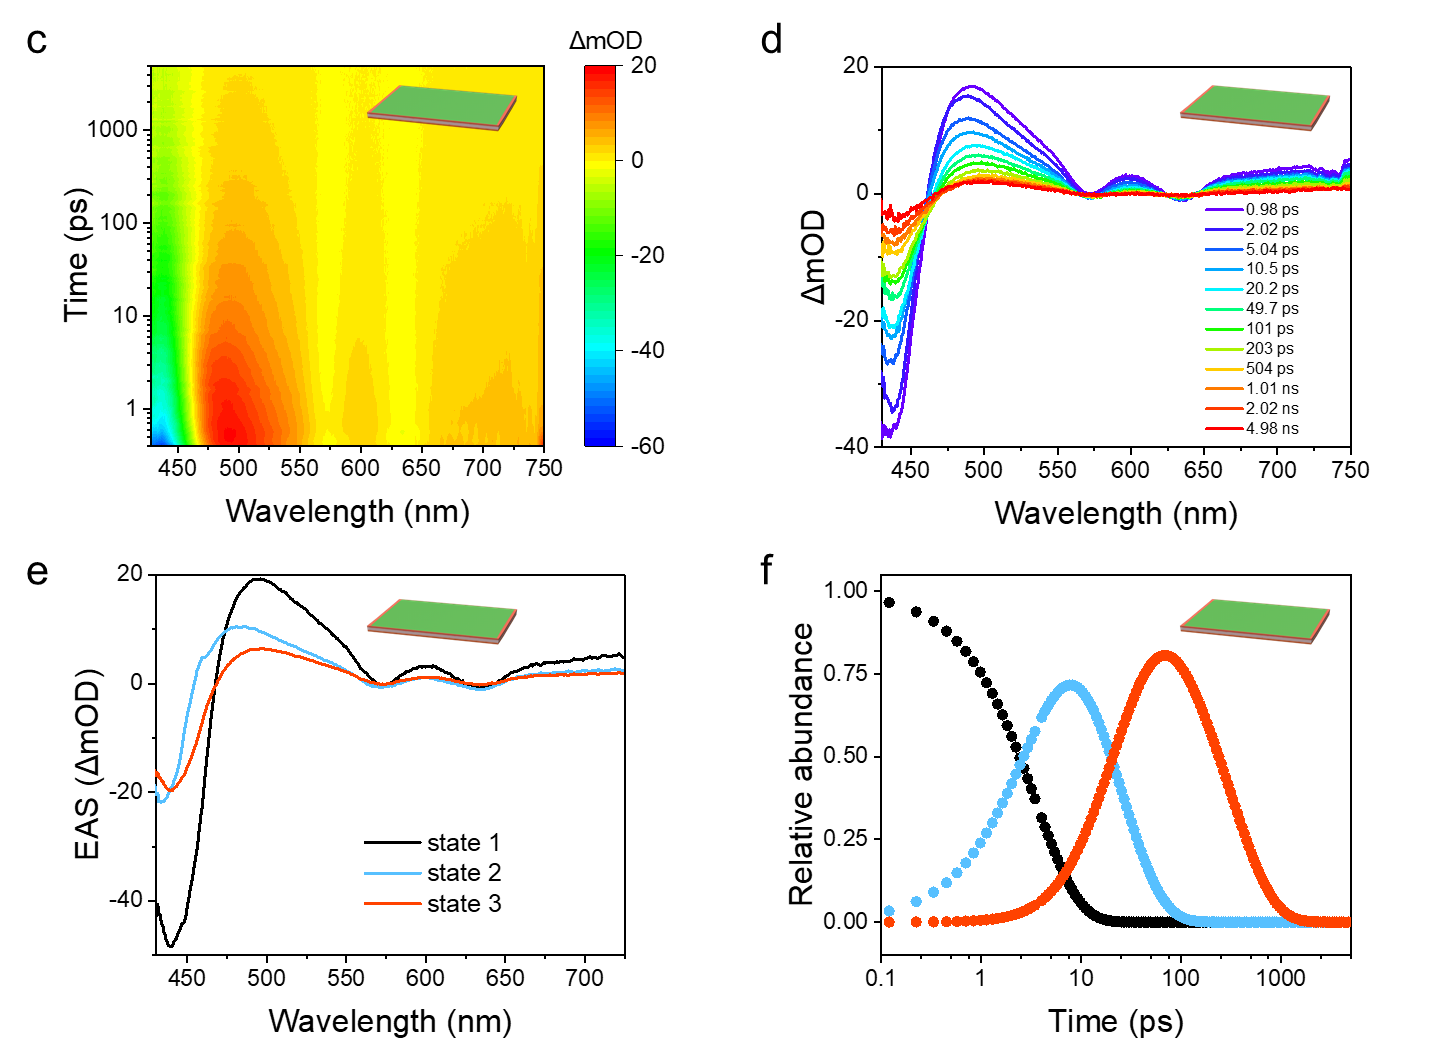


**Supplementary Fig. 25** | 2D fs-TAS and curves of **SN** (a,b) and **SN-Co** (c,d). OD, optical density. (e) Evolution-associated difference spectra (EAS) via global fitting analysis to 3 excitation states for **SN-Co** according to the kinetic model in Fig. 5e. (f) Time evolution of state population for **SN-Co**.


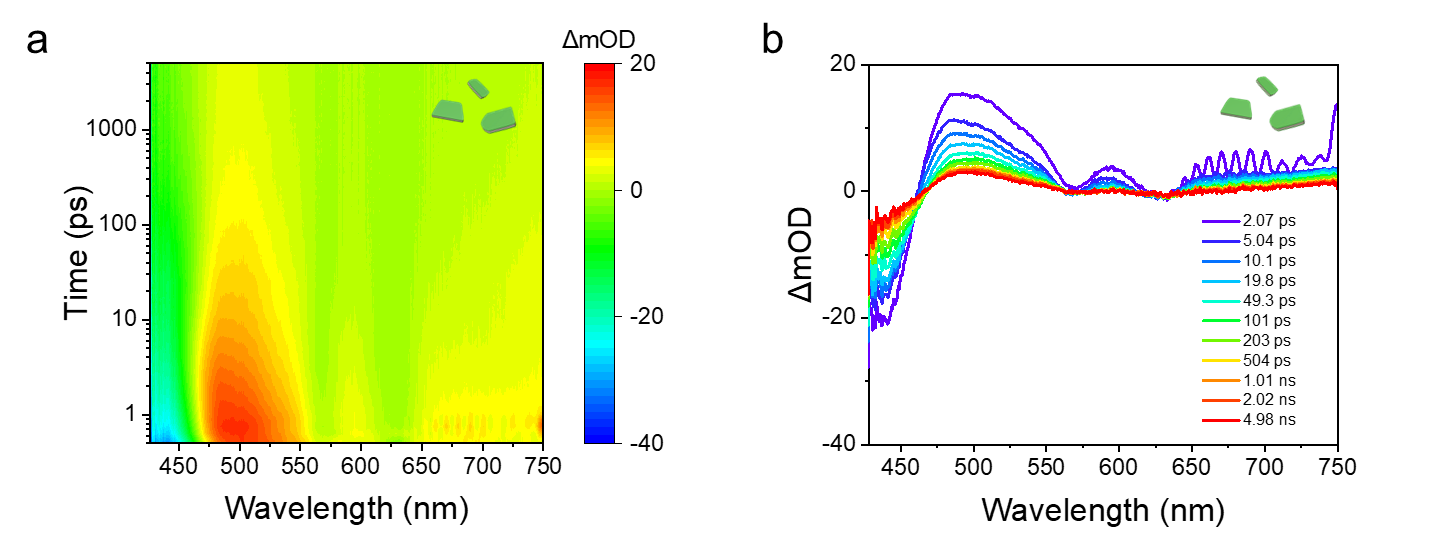


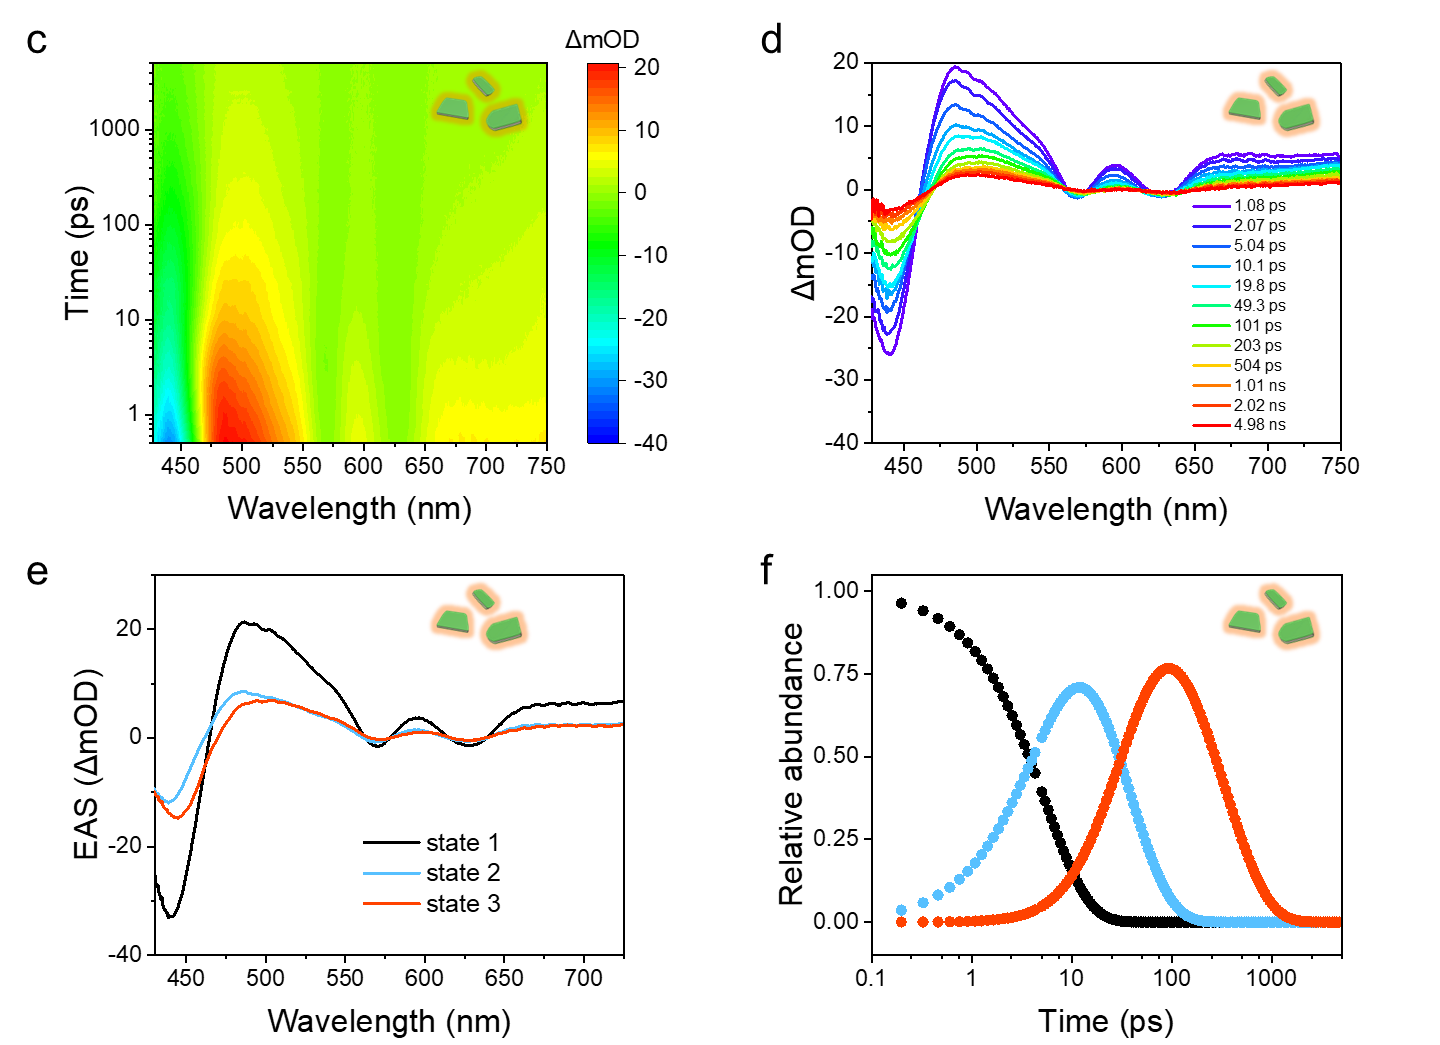


**Supplementary Fig. 26** | 2D fs-TAS and curves of seeds (a,b) and **seed-Co** (c,d). OD, optical density. (e) Evolution-associated difference spectra (EAS) via global fitting analysis to 3 excitation states for **seed-Co** according to the kinetic model in Fig. 5e. (f) Time evolution of state population for **seed-Co**.


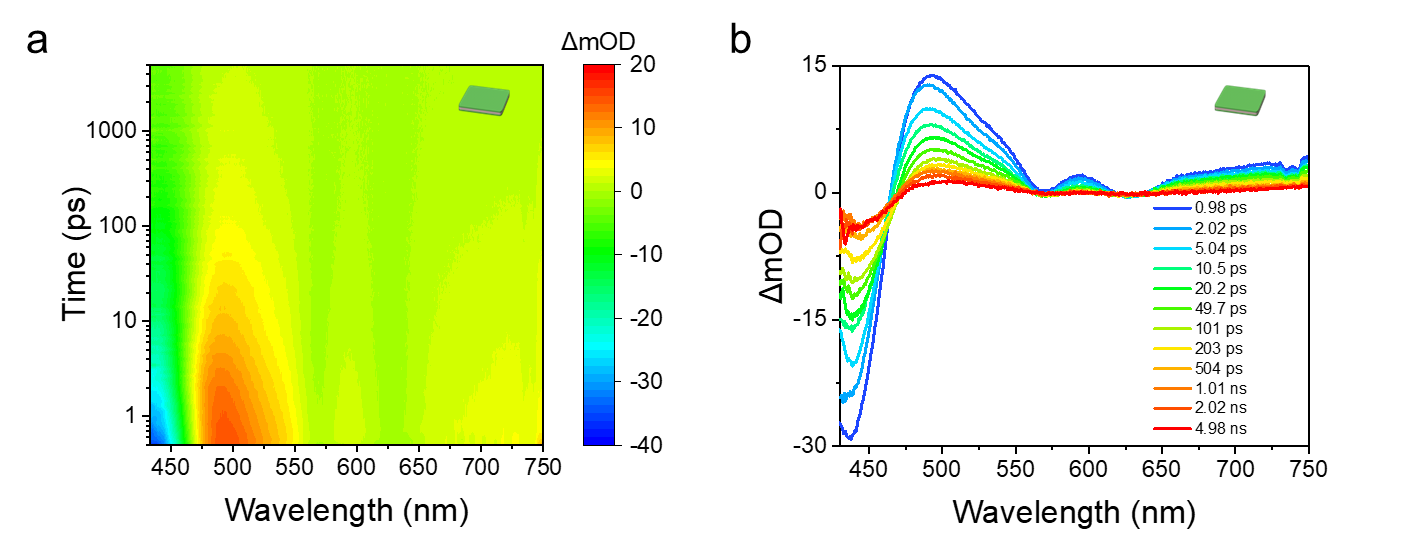


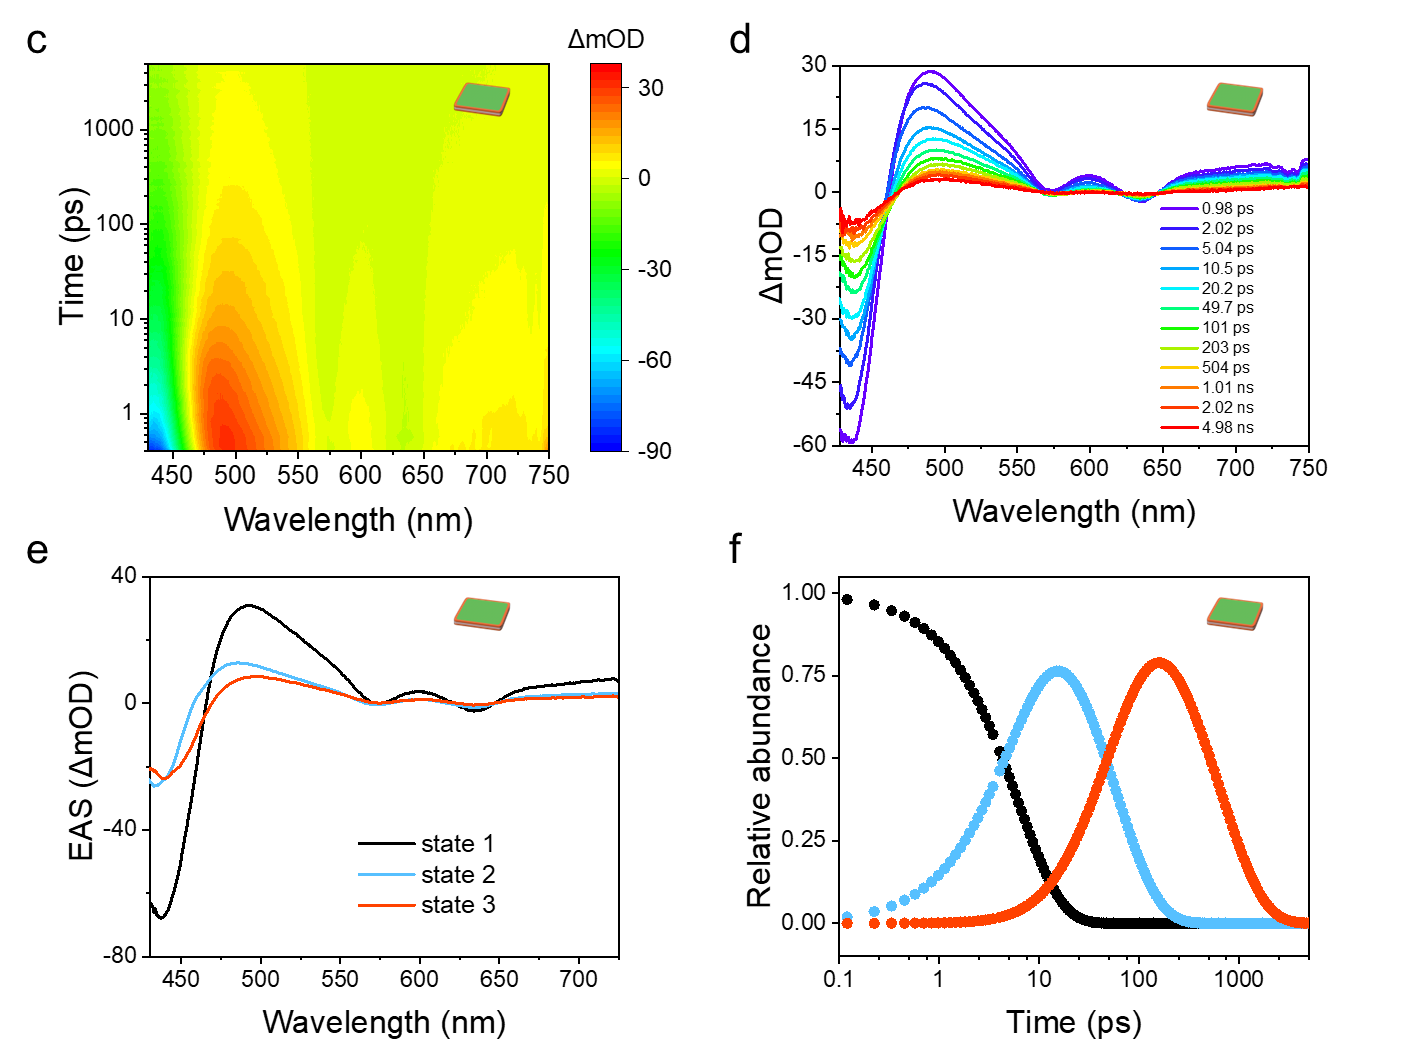


**Supplementary Fig. 27** | 2D fs-TAS and curves of **GZn2** (a,b) and **GZn2-Co** (c,d). OD, optical density. (e) Evolution-associated difference spectra (EAS) via global fitting analysis to 3 excitation states for **GZn2-Co** according to the kinetic model in Fig. 5e. (f) Time evolution of state population for **GZn2-Co**.


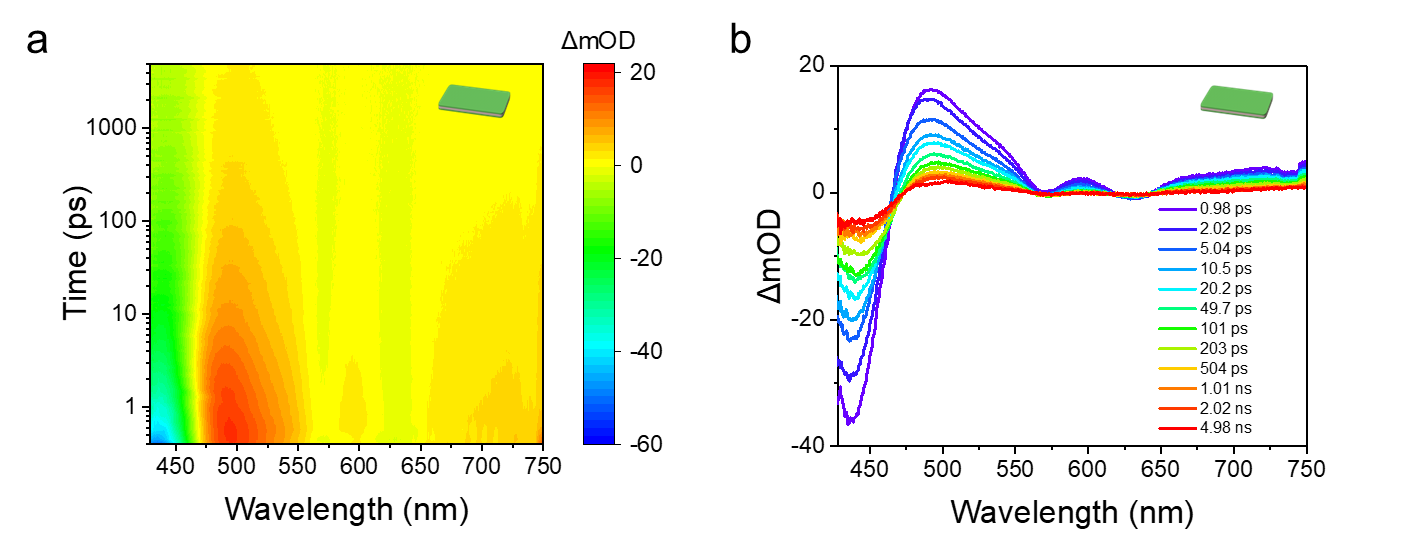


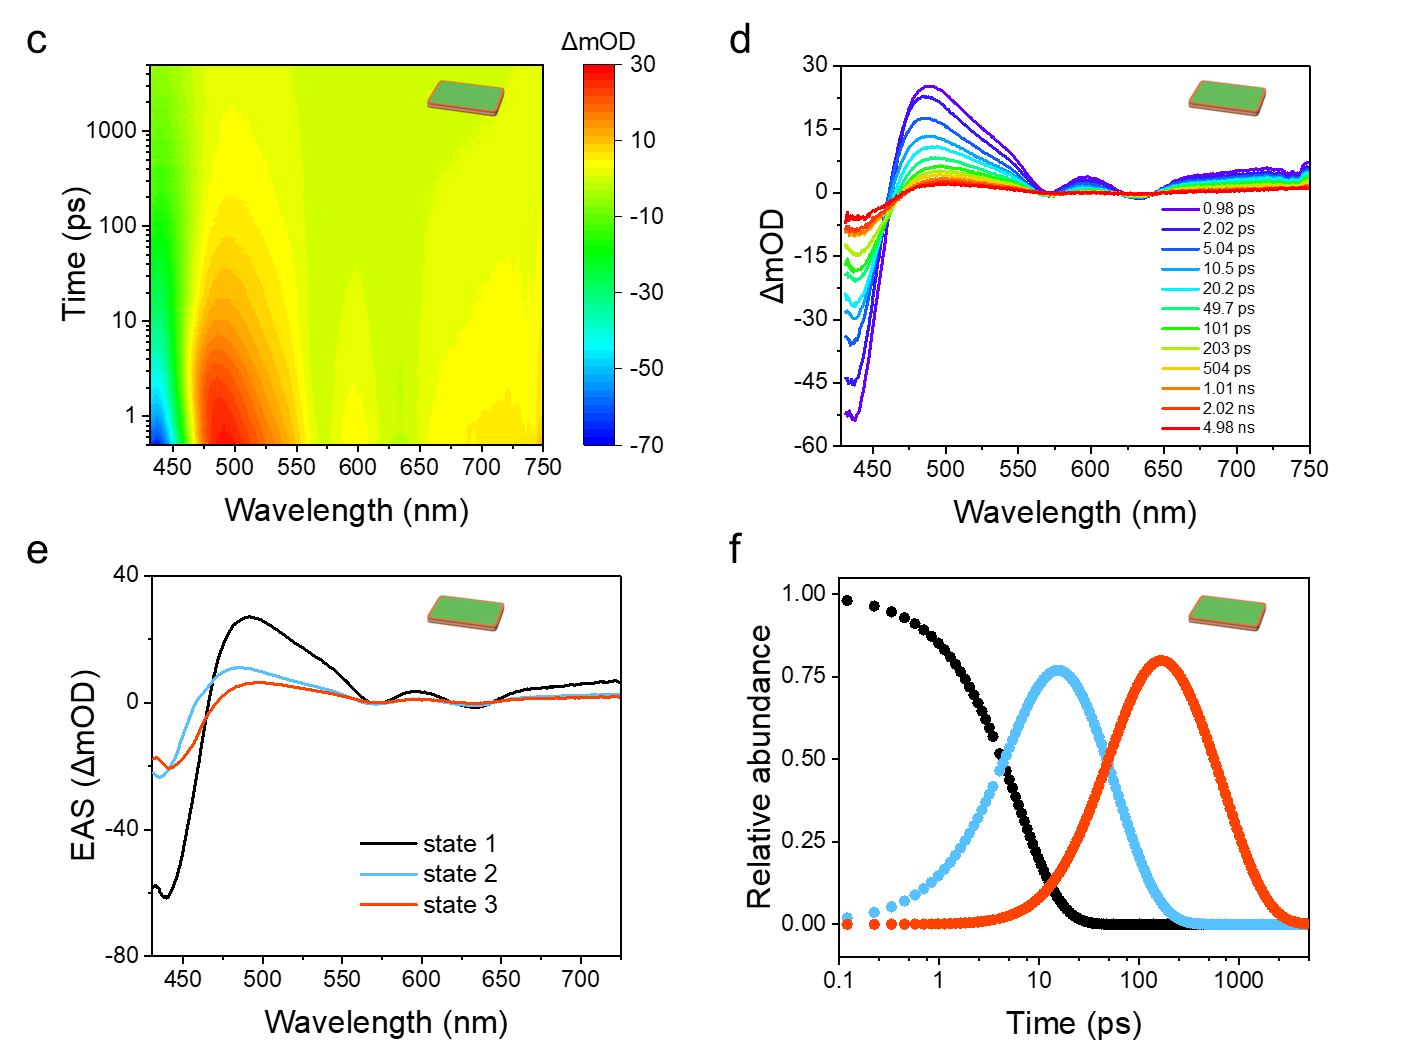


**Supplementary Fig. 28** | 2D fs-TAS and curves of **GZn4** (a,b) and **GZn4-Co** (c,d). OD, optical density. (e) Evolution-associated difference spectra (EAS) via global fitting analysis to 3 excitation states for **GZn4-Co** according to the kinetic model in Fig. 5e. (f) Time evolution of state population for **GZn4-Co**.


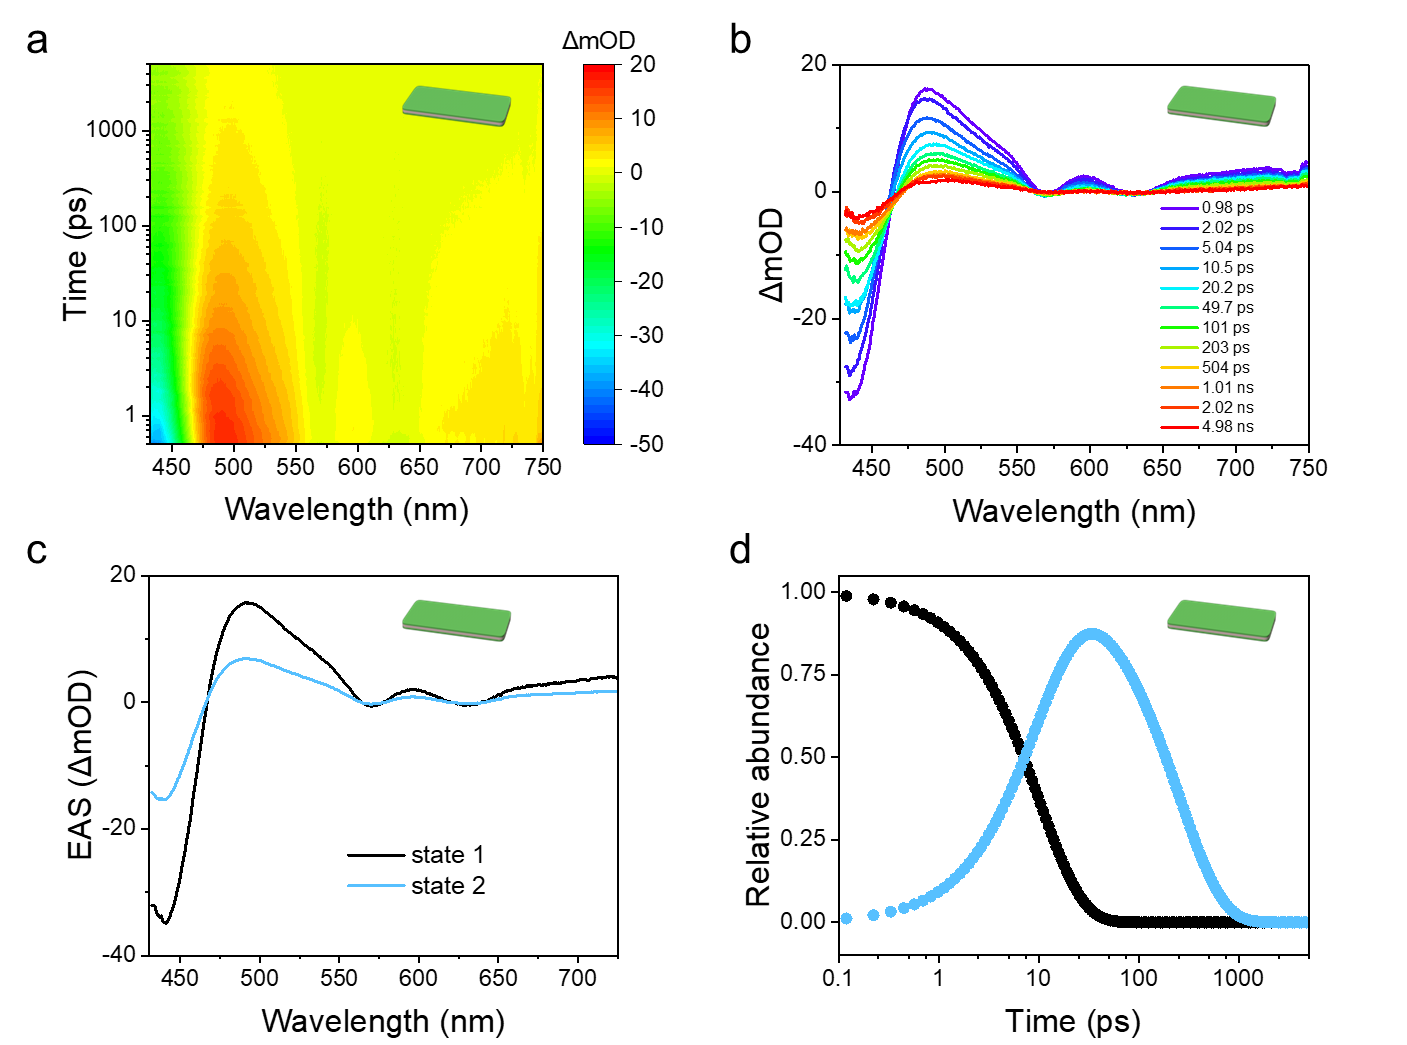


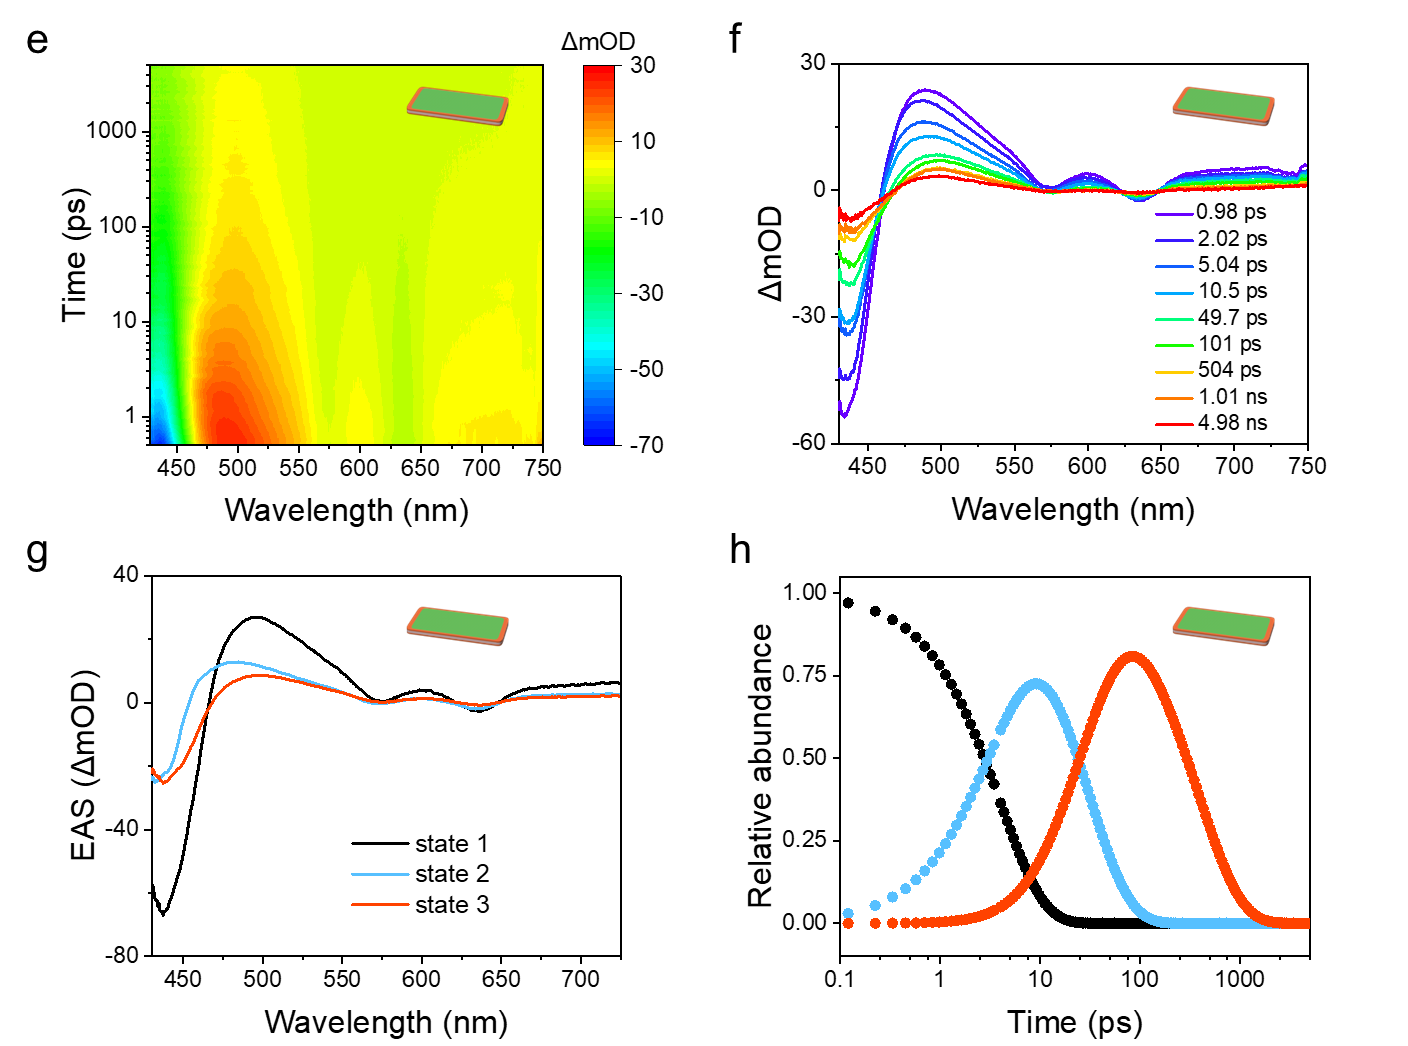


**Supplementary Fig. 29** | 2D fs-TAS and curves of **GZn6** (a,b) and **GZn6-Co** (e,f). OD, optical density. (c) Evolution-associated difference spectra (EAS) via global fitting analysis to 2 excitation states for **GZn6** according to the two-stage kinetic model. (d) Time evolution of state population for **GZn6**. (g) EAS for **GZn6-Co** according to the three-stage kinetic model. (h) State population for **GZn6-Co**.


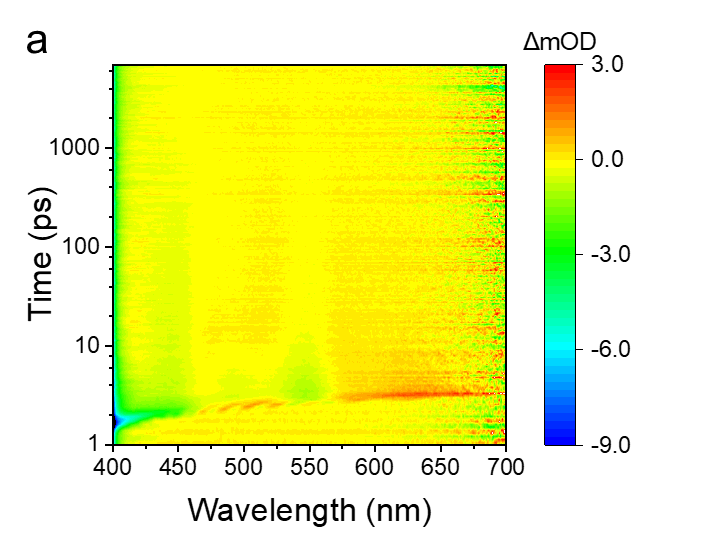


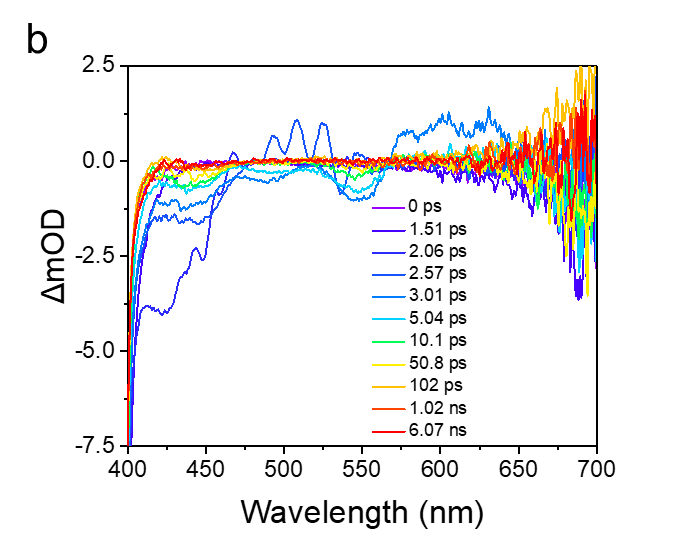


**Supplementary Fig. 30** | Fs-TAS and curves of 0.2 mM **TPPCo** in MeOH/H2O (v/v = 1/1) after annealing at 60 °C for 30 min and placing at 20 °C for 24 h.


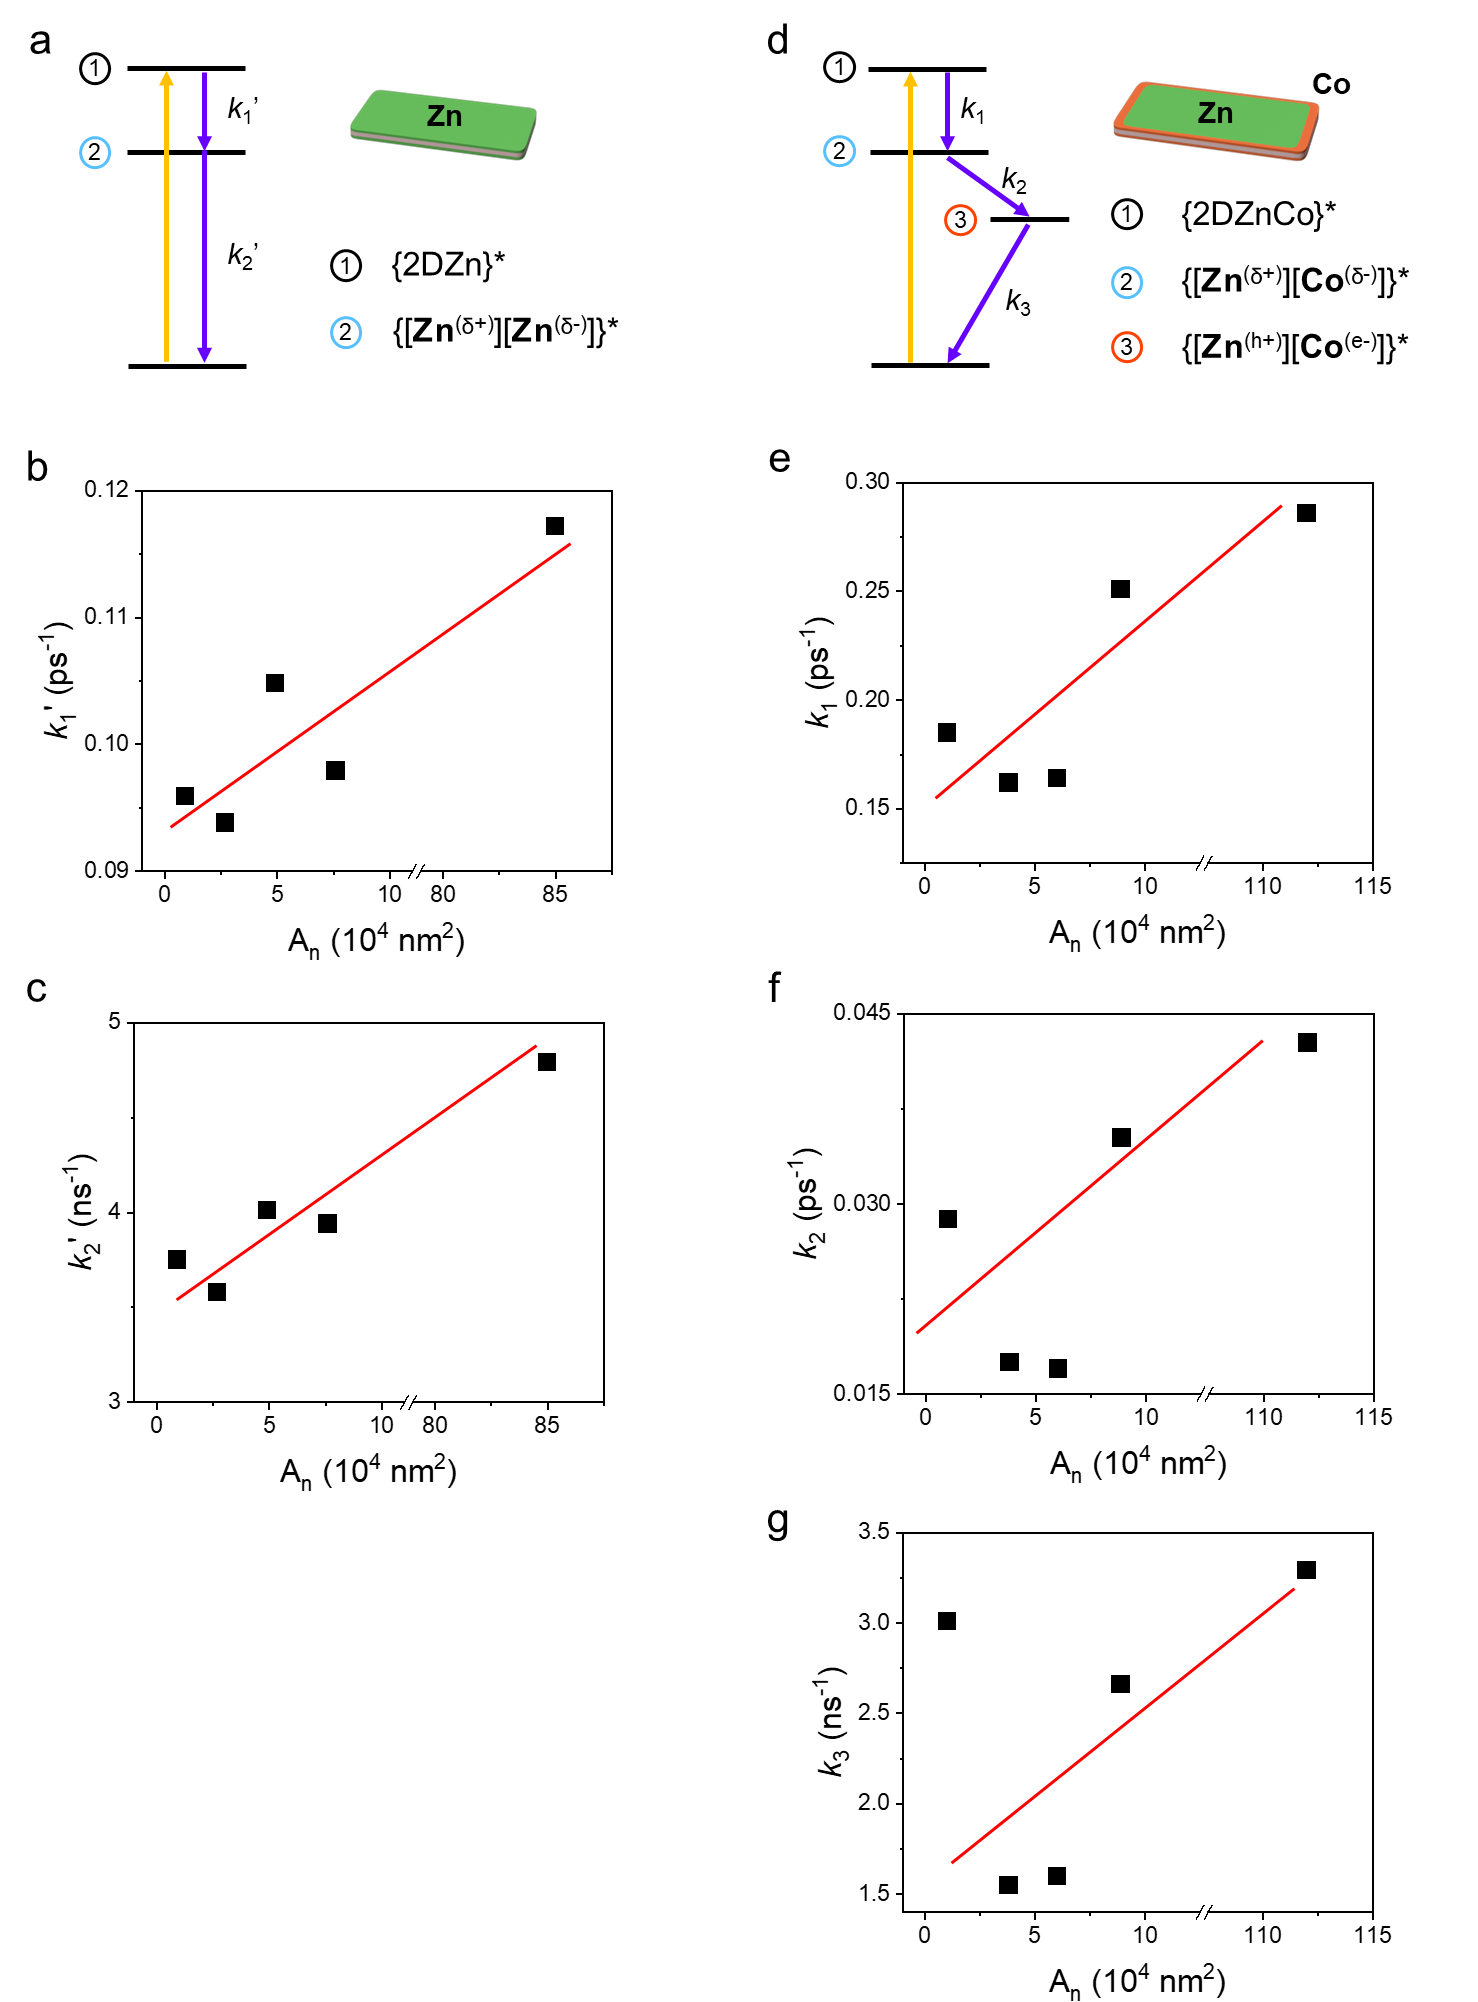


**Supplementary Fig. 31** | (a) 2-stage kinetic decay model and (b,c) rate constants fitted (k1’ and k2’) of 2D Zn-porphyrin platelets with various An via global fitting of fs-TAS data. (d) 3-stage kinetic decay model and (e-g) rate constants fitted (k1, k2, and k3) of 2D heterostructures with various An via global fitting of fs-TAS data. Red lines are indicative trend lines for the excited-state size effect.

**IV.** **Tables**

**Supplementary Table 1.** Statistical data of 2D **TPPZn**-seeded growth. An and PDI stand for the number-average area of platelets and the polydispersity index, respectively. **SN** represents 2D platelets formed by self-nucleation. **GZn** and the following number represents platelets formed by seeded growth experiments and the molar ratio of monomer to seed (nm/ns).

| **Sample Name** | **An** (× 104 nm2) | **PDI** | **Aspect Ratio** |
| --- | --- | --- | --- |
| **SN** (Fig. 2a) | 27 | 1.44 | 8.3 |
| **Seeds** (Fig. 3b) | 0.90 | 2.03 | 2.1 |
| **GZn2** (Fig. 3c) | 2.7 | 1.71 | 7.9 |
| **GZn4** (Fig. 3d) | 4.9 | 1.31 | 7.2 |
| **GZn6** (Fig. 3e) | 7.6 | 1.33 | 7.7 |
| **GZn8** (Fig. 3f) | 9.6 | 1.57 | 9.5 |

**Supplementary Table 2.** Statistical data of seeded growth of **TPPCo** on **GZn6**. An and PDI stand for the number-average area of platelets and the polydispersity index, respectively. **GZn6** represents 2DZnplatelets used for seeded growth. **GZn6-Co** and the following number represent the co-assembly formed by the seeded growth experiment and the relative molar ratio of monomer to seed (Co/Zn).

| **Sample Name** | **An** (× 104 nm2) | **PDI** | **Aspect Ratio** |
| --- | --- | --- | --- |
| **GZn6** | 7.6 | 1.33 | 7.7 |
| **GZn6-Co0.1** | 8.3 | 1.34 | 6.6 |
| **GZn6-Co0.2** | 8.9 | 1.48 | 6.1 |
| **GZn6-Co0.5** | 6.7 | 1.34 | 6.2 |
| **GZn6-Co1** | 9.5 | 1.72 | 7.1 |

**Supplementary Table 3.** Fitted fluorescence lifetime of **GZn6-Co** of different Co/Zn under FLIM.Lifetime was measured in various regions of a single nanosheet, which was manually obtained. *τ*D, *τ*A, and *τ*Ave denote the lifetimes at the inner, outer, and entire nanosheet, respectively (see Fig. 4 and Supplementary Figs. 21-23). For **GZn6**, the nanosheet as a whole exhibited a lifetime of 2.2 ns.

| **Sample Name** | Co/Zn | ***τ*Ave**(ns) | ***τ*D**(ns) | ***τ*A**(ns) |
| --- | --- | --- | --- | --- |
| **GZn6** | 0 | 2.2 | 2.2 | - |
| **GZn6-Co0.1** | 0.1 | 3.0 | 1.8 | 4.2 |
| **GZn6-Co0.2** | 0.2 | 2.0 | 1.4 | 2.1 |

**Supplementary Table 4.** Comparison of key photophysical parameters of the controlled assemblies with recently reported donor-acceptor supramolecular systems via global fitting.

| **Donor-acceptor** | **Exciton migration**  ***k*1** (1011 s-1) | **Charge separation**  ***k*2** (1010 s-1) | **Electron injection**  **τ3** (ns) | **References** |
| --- | --- | --- | --- | --- |
| **GZn6** | 0.98 | - | - | This work |
| **GZn6-Co** | 2.5 | 3.5 | <0.38 | This work |
| **Nalg-4 + C2** | 5.6 | 1.6 | <2.4 | [9] |
| **[PBI]5Ru4POM** | 7.3 | 4.0 | <1.1 | [10] |
| **(ZnP)3−H2P−C60** | 0.83 | 0.37 | <8.3 | [11] |

**V. 1H and 13C NMR Spectra**

**Supplementary Fig. 32** | 1H NMR spectra of **B1**

**Supplementary Fig. 33** | 1H NMR spectra of **B2**

**Supplementary Fig. 34** | 1H NMR spectra of **T-COOMe**

**Supplementary Fig. 35** | 1H NMR spectra of **T-COOH**

**Supplementary Fig. 36** | 1H NMR spectra of **TPP**

**Supplementary Fig. 37** | 13C NMR spectra of **TPP**

**Supplementary Fig. 38** | 1H NMR spectra of **TPPH2**-PF6

**Supplementary Fig. 39** | 13C NMR spectra of **TPPH2**-PF6

**Supplementary Fig. 40** | 1H NMR spectra of **TPPZn**

**Supplementary Fig. 41** | 13C NMR spectra of **TPPZn**

**Supplementary Fig. 42** | 1H NMR spectra of **m-D-COOMe**

**Supplementary Fig. 43** | 1H NMR spectra of **m-D-COOH**

**Supplementary Fig. 44** | 1H NMR spectra of **m-DPP**

**Supplementary Fig. 45** | 13C NMR spectra of **m-DPP**

**Supplementary Fig. 46** | 1H NMR spectra of **m-DPPH2**-PF6

**Supplementary Fig. 47** | 13C NMR spectra of **m-DPPH2**-PF6

**Supplementary Fig. 48** | 1H NMR spectra of **m-DPPZn**

**Supplementary Fig. 49** | 13C NMR spectra of **m-DPPZn**

**Supplementary Fig. 50** | 1H NMR spectra of **o-D-COOMe**

**Supplementary Fig. 51** | 1H NMR spectra of **o-D-COOH**

**Supplementary Fig. 52** | 1H NMR spectra of **o-DPP**

**Supplementary Fig. 53** | 13C NMR spectra of **o-DPP**

**Supplementary Fig. 54** | 1H NMR spectra of **o-DPPH2**-PF6

**Supplementary Fig. 55** | 13C NMR spectra of **o-DPPH2**-PF6

**Supplementary Fig. 56** | 1H NMR spectra of **o-DPPZn**

**Supplementary Fig. 57** | 13C NMR spectra of **o-DPPZn**

**Supplementary Fig. 58** | 1H NMR spectra of **S-COOMe**

**Supplementary Fig. 59** | 1H NMR spectra of **S-COOH**

**Supplementary Fig. 60** | 1H NMR spectra of **SPP**

**Supplementary Fig. 61** | 13C NMR spectra of **SPP**

**Supplementary Fig. 62** | 1H NMR spectra of **SPPH2**-PF6

**Supplementary Fig. 63** | 13C NMR spectra of **SPPH2**-PF6

**Supplementary Fig. 64** | 1H NMR spectra of **SPPZn**

**Supplementary Fig. 65** | 13C NMR spectra of **SPPZn**

**References**

1. Helmich, F. et al. Dilution-induced self-assembly of porphyrin aggregates: A consequence of coupled equilibria. *Angew. Chem. Int. Ed.* **49**, 3939−3942 (2010).
2. Wu, C. et al. Energy transfer in a nanoscale multi-chromophoric system: Fluorescent dye-doped conjugated polymer nanoparticles. *J. Phys. Chem. C* **112**, 1772−1781 (2008).
3. Mu, B. et al. Bioinspired polymeric supramolecular columns as efficient yet controllable artificial light-harvesting platform. *Nat. Commun.* **15**, 903−912 (2024).
4. Katagiri, T. & Amao, Y. Visible light driven selective NADH regeneration using a system of water-soluble zinc porphyrin and homogeneous polymer-dispersed rhodium nanoparticles. *New J. Chem.* **45**, 15748−15752 (2021).
5. Janni, D. S. & Manheri, M. K. Hierarchical preferences of hydroxylated oxanorbornane-based achiral amphiphiles. *Langmuir* **29**, 15182−15190 (2013).
6. Ziessel, R. et al. Tuning organogels and mesophases with phenanthroline ligands and their copper complexes by inter- to intramolecular hydrogen bonds. *J. Am. Chem. Soc.* **126**, 12403−12413 (2004).
7. Suárez, S. et al. Lanthanide luminescent mesomorphic complexes with macrocycles derived from diaza-18-crown-6. *New J. Chem.* **29**, 1323−1334 (2005).
8. Yap, S. Y. et al. Synthesis of a porphyrin with histidine-like chelate: An efficient path towards molecular PDT/SPECT theranostics. *Chem. Commun.* **56**, 11090−11093 (2020).
9. Yu, J. et al. Artificial spherical chromatophore nanomicelles for selective CO2 reduction in water. *Nat. Catal.* **6**, 464-475 (2023).
10. Bonchio, M. et al. Hierarchical organization of perylene bisimides and polyoxometalates for photo-assisted water oxidation. *Nat. Chem.* **11**, 146-153 (2019).
11. Wolf, M. et al. Rigid, branched porphyrin antennas: control over cascades of unidirectional energy funneling and charge transfer. *J. Am. Chem. Soc.* **139**, 11779-11788 (2017).
